1 ***Drosophila* Toll links systemic immunity to long-term intestinal function.**

2 Magda L. Atilano<sup>1,2</sup>, Marcus Glittenberg<sup>2</sup>, Shivohum Bahuguna, Lihui Wang and Petros Ligoxygakis

3 Laboratory of Cell Biology, Development and Genetics, Department of Biochemistry, University of  
4 Oxford, South Parks Rd OX1 3QU Oxford UK.

5 <sup>1</sup>Present address: Institute for Healthy Aging, University College London, Gower Street WC1E 6BT,  
6 London UK.

7 <sup>2</sup>These authors contributed equally to this work

8 Lead Contact and corresponding author: [petros.ligoxygakis@bioch.ox.ac.uk](mailto:petros.ligoxygakis@bioch.ox.ac.uk)

9

10 **Abstract:** The intestine is an organ where immune and metabolic functions are co-ordinated with  
11 tissue renewal via progenitor somatic stem cells (PSSCs). How this is achieved is still unclear. We  
12 report that in *Drosophila*, a generalised infection increased PSSC numbers. This was mimicked by  
13 expressing a constitutive form of the immune receptor Toll in PSSCs and blocked when Toll was  
14 silenced via RNAi. Without infection, absence of bacterial recognition and downstream Toll signalling  
15 resulted in a short lifespan and an age-dependent decrease of PSSCs and gut microbiota. The latter  
16 implied a metabolic environment incompatible with the presence of bacteria. Indeed, infection or  
17 constitutive Toll signalling in PSSCs triggered 4E-BP transcription in enterocytes, while loss of  
18 signalling reduced it. 4E-BP controlled fat levels and sustained the microbiota suggesting that Toll-  
19 dependent regulation of 4E-BP was important for long-term gut function. Therefore, the Toll  
20 pathway is crucial for responses to both infection and microbiota.

21 To Thanasis Loukeris *in memoriam*

22

23 **Introduction:** Innate immunity is the first-line host defence conserved in all metazoans and plants  
24 (reviewed in Ronald and Beutler, 2010). In this context, Toll-like receptor (TLR) signalling is one of  
25 the most important mechanisms by which the innate immune system senses the invasion of  
26 pathogenic microorganisms in both mammals and *Drosophila*. Unlike its mammalian counterparts  
27 however, the fruit fly Toll is activated by an endogenous cytokine-like ligand, the Nerve Growth  
28 Factor homologue, Spz (Weber et al, 2003). Spz is processed to its active form by the Spz-Processing  
29 Enzyme (SPE) (Jiang et al, 2006). Two serine protease cascades converge on SPE: one triggered by  
30 bacterial or fungal serine proteases and a second activated by host receptors that recognise  
31 bacterial or fungal cell wall. Prominent among these host receptors is the Peptidoglycan Recognition  
32 Protein-SA or PGRP-SA (Michel et al, 2001), which is considered to preferentially bind to Lys-type  
33 Peptidoglycan from Gram-positive bacteria (Chang et al, 2004). When the recognition signal reaches  
34 the cell surface, it is communicated downstream via the Toll receptor and a membrane-bound  
35 receptor-adaptor complex including dMyd88, Tube (as an IRAK4 functional equivalent) and the Pelle  
36 kinase (as an IRAK1 functional homologue) (Marek and Kagan 2012). Transduction of the signal  
37 culminates in the phosphorylation of the I $\kappa$ B homologue, Cactus (Daigneault et al, 2013). This  
38 modification requires the fly  $\beta$ TrCP protein Slimb (Daigneault et al, 2013) and targets Cactus for  
39 degradation, leaving the NF- $\kappa$ B homologue DIF to move to the nucleus and regulate hundreds of  
40 target genes including a battery of powerful antimicrobial peptides (AMPs) (de Gregorio et al, 2002).

41 Similar to mammals, the high capacity of intestinal epithelial regeneration in *Drosophila* depends on  
42 intestinal stem cells (ISCs). These multipotent ISCs, which are distributed along the basement  
43 membrane of the posterior midgut have a simple pattern of division (Ohlstein and Spradling 2006;  
44 Ohlstein and Spradling 2007, reviewed in Lemaitre and Miguel- Aliaga, 2013). An ISC divides to  
45 produce itself and an enteroblast (EB), which will undergo terminal differentiation into an  
46 enterocyte (EC) or an enteroendocrine cell (EE). Progenitor cells (ISCs and EBs) express a  
47 transcription factor called Escargot (*esg*) (Ohlstein and Spradling 2006; Ohlstein and Spradling 2007;

48 Amcheslavsky et al 2009). Thus, expression of *esg* is often used as a surrogate marker for studying  
49 both ISCs and EBs in the anterior midgut. Previous studies have shown that direct local damage to  
50 the gut by oxidative stress, toxins or ingestion of bacteria leads to EC apoptosis, stimulating ISCs to  
51 proliferate and replenish EC numbers (Amcheslavsky et al 2009; Buchon et al, 2009). In this context,  
52 intestinal microbiota impacted on the rate of ISC proliferation by stimulating them to keep a higher  
53 “baseline” of epithelial turnover (Buchon et al, 2009). However, less is known about what happens  
54 after systemic infection. Septic injury with the Gram-negative bacterium *Erwinia carotovora*  
55 *carotovora-15* (*Ecc-15*) promotes ISC proliferation through cytokine signalling mediated by blood  
56 cells (Chakrabarti et al, 2016). In addition, sterile wounding also causes EC apoptosis and triggers ISC  
57 proliferation (Takeishi et al, 2013).

58 The intestine has also a metabolic role and this depending on the context is coordinated by insulin,  
59 FOXO and TOR (reviewed in Miguel-Aliaga et al, 2018). One of the downstream components of this  
60 signalling network is the translational inhibitor 4E-BP (Miron et al, 2003). It has been hypothesised  
61 that the control of 4E-BP activity in flies could provide a means to control fat metabolism during  
62 stress conditions (Teleman et al, 2005). In adults, 4E-BP is important for infections that activate the  
63 Toll pathway, since 4E-BP mutant flies are highly susceptible to fungal and Gram-positive bacterial  
64 infections (Bernal and Kimbrell 2000). In larvae, FOXO induces 4E-BP activation following *Ecc-15* oral  
65 infection or starvation stress, which tips the balance towards translation of cap independent  
66 transcripts including AMPs (Vasuedan et al, 2017). Thus, 4E-BP may provide the link between  
67 systemic Toll activation and metabolic control.

68 After the discovery of intestinal T-cells expressing TLRs, we know that the immune system can  
69 discriminate between and regulate appropriate responses towards, non-infectious non-self (e.g. gut  
70 microbiota) vs. infectious non-self (reviewed in Kubinak and Round 2012). However, it is less clear  
71 how immune response signals from a systemic infection will be integrated at the intestine level by  
72 ISCs and ECs with the aim of maintaining tissue integrity and normal gut microbiota. In the present

73 work, we investigated how systemic infection triggering *Drosophila* Toll/TLR signalling may be linked  
74 to long-term intestinal homeostasis.

75 **Results and discussion:** To trace intestinal progenitor cells (ISCs and EBs) we used the  
76 GAL4/GAL80<sup>ts</sup>/UAS system (Suster et al, 2004). The driver for GAL4 expression was the *esg* gene  
77 promoter. Normally, GAL80 is an inhibitor of GAL4 but the temperature sensitive allele used was  
78 able to do this only at the permissive temperature (18°C) and not at the restrictive temperature  
79 (30°C). In all the experiments described in this work, developing flies were cultured at 18°C and on  
80 eclosion emerging adults were shifted to 30°C. When 20-day old adults expressing GFP under the  
81 *esg* promoter in the anterior midgut (Fig. 1A) were injected in the thorax with the opportunistic  
82 fungal pathogen *Candida albicans* (*C. albicans*), we observed a statistically significant increase of  
83 GFP-positive cells 36h post-infection (Fig. 1B). This result indicated that systemic immunity regulated  
84 intestinal progenitor cell numbers. Since Toll is the pathway primarily responding to fungal infections  
85 in *Drosophila* (reviewed in Kounatidis and Ligoxygakis 2012), we attempted to reproduce the result  
86 by mimicking Toll triggering by infection. To this end, we expressed Toll10B, a constitutively active  
87 form of Toll (Shia et al, 2009) in *esg*-expressing cells with the GAL4/GAL80<sup>ts</sup>/UAS system  
88 (*esg*<sup>ts</sup>>*Toll10B*). This led to a significant increase of GFP positive (GFP<sup>+</sup>) cells (Fig. 1C). When we  
89 expressed UAS-Toll10B and UAS-GFP with *Su(H)*-GAL4, GAL80<sup>ts</sup> [*Su(H)*<sup>ts</sup>, an EB-specific GAL4; Zeng et  
90 al, 2010], we also observed a significant rise in the numbers of large GFP<sup>+</sup> cells (resembling EBs) in  
91 *Su(H)*<sup>ts</sup>>*Toll10B* flies (Fig. 1C). This could be interpreted as either 1) Toll signalling creating a  
92 “roadblock” for further EB differentiation (hence the increase in GFP cells may be a “backlog” of EBs)  
93 or 2) Toll inducing division of the existing EBs to produce more of the same. However, staining with  
94 an antibody against the phosphorylated form of Histone 3 (pH3) to assay cell proliferation did not  
95 show any pH3 staining in *Su(H)*<sup>ts</sup>>*Toll10B* guts (Fig. S1A). This indicated that the increase of GFP<sup>+</sup> cells  
96 in *Su(H)*<sup>ts</sup>>*Toll10B* flies was not a result of EB proliferation. Nevertheless, data in Fig. 1 show that

97 systemic *C. albicans* infection or constitutive Toll signalling was sufficient to increase the pool of  
98 progenitor cells.

99 We next asked whether, in addition to being sufficient, Toll was also necessary for  
100 controlling intestinal epithelial renewal following systemic fungal infection. We silenced Toll (using  
101 an RNAi line from the VDRC collection) in progenitor cells using *esg<sup>ts</sup>*. Development proceeded at  
102 the permissive temperature (18°C, GAL80 ON, GAL4 OFF, Toll RNAi OFF). Emerging day 1 adults  
103 were transferred to the restrictive temperature of 30°C (GAL80 OFF, GAL4 ON, Toll RNAi ON) and  
104 infected with *C. albicans* 20 days later. After infection we examined the number of GFP-positive cells  
105 at 36h post-infection. As a control for the RNAi mechanism we used a random line from the same  
106 VDRC collection (*UAS-CG7923<sup>RNAi</sup>*) that did not compromise host survival when infected with *C.*  
107 *albicans* and exhibited a normal lifespan compared to its genetic background in the absence of  
108 infection (our unpublished observations). The use of an endogenous gene as a control instead of an  
109 inert one (e.g. RFP) ensured that we controlled for the actual triggering of the RNAi mechanism *in an*  
110 *existing host gene*.

111 In control flies, we observed an increase of GFP-positive cells when comparing sterile injury  
112 (PBS) with septic injury (*C. albicans*) (Fig. 2A), which was statistically significant when quantified (Fig.  
113 2B). Silencing Toll prevented an increase in progenitor cells following infection since GFP-positive  
114 cells after PBS injection or *C. albicans* challenge were statistically inseparable when compared (Fig.  
115 2B). In contrast to controls, *esg<sup>ts</sup>>Toll<sup>RNAi</sup>* flies were unable to increase ISC proliferation following  
116 infection (Fig. S1B). Taken together these results indicated that Toll was also necessary for the long-  
117 term renewal of the intestinal epithelium following infection. Moreover, we noted that the number  
118 of GFP positive cells in *esg<sup>ts</sup>>CG7923<sup>RNAi</sup>* flies was significantly higher than in *esg<sup>ts</sup>>Toll<sup>RNAi</sup>* flies  
119 after PBS treatment, raising the possibility that the intestines of *esg<sup>ts</sup>>Toll<sup>RNAi</sup>* had less progenitor  
120 cells in 20-day old adult guts even in the absence of infection (Fig. 2B).

121 To test long-term renewal of the intestinal epithelium in the absence of infection, we  
122 assayed guts from 6-day old and 20-day old *esg<sup>ts>Toll</sup>RNAi* flies and compared them to  
123 chronologically age-matched *esg<sup>ts>CG7923</sup>RNAi* controls. When comparing 6-day old and 20-day old  
124 flies, we found that at 20 days the shape of GFP positive progenitor cells in guts of *esg<sup>ts>Toll</sup>RNAi*  
125 adults was significantly altered compared to *esg<sup>ts>CG7923</sup>RNAi*, with cells becoming smaller and  
126 more rounded (Fig. 3A). They were also significantly reduced in numbers (Fig. 3B), with the tissue  
127 becoming extremely fragile to handle. Moreover, cultivable intestinal microbiota was significantly  
128 lower at 20-days as measured by Colony Forming Units (CFUs) (Fig. 3C). The same effect on cell  
129 numbers and cell shape in 20-day old flies was also observed when Toll was silenced in EBs  
130 [*Su(H)<sup>ts>Toll</sup>RNAi*] (Fig. S2).

131 In the absence of infection, 20-day old flies mutant for the upstream-most Toll pathway  
132 component namely, *PGRP-SA<sup>semi</sup>* (Michel *et al*, 2001) showed a reduction in ISC proliferation with  
133 fewer ISCs dividing to EBs (Fig 4A). The latter were marked with an antibody against anti-hrp (Han *et*  
134 *al*, 2015; O'Brien *et al*, 2011). Moreover, PGRP-SA-deficient flies exhibited a significant reduction in  
135 the numbers of progenitor cells in general, and ISCs in particular (Fig. 4B). This was also reflected in  
136 the very low ISC proliferation seen in *PGRP-SA<sup>semi</sup>* mutants compared to controls (Fig. S3). In  
137 addition, *spz* mutant flies had significantly reduced ECs (Fig. S4). Expression of Toll10B in *PGRP-*  
138 *SA<sup>semi</sup>* progenitor cells was able to reconstitute progenitor cells in the anterior midgut (Fig. S5A)  
139 with numbers statistically indistinguishable from *yw*, the genetic background of *PGRP-SA<sup>semi</sup>* (Fig.  
140 S5B). Moreover, 20-day old PGRP-SA and DIF mutants showed a reduction in intestinal microbiota  
141 when total intestinal 16S rRNA genes were semi-quantified (Fig. S6), as well as significantly reduced  
142 lifespan of both male and female flies (Fig. S7). Taken together, these results showed that Toll was  
143 both necessary and sufficient for regulating the long-term regeneration potential of the intestine  
144 after an immune challenge but also in the absence of infection.

145           Microbiota reduction pointed towards a metabolic shift in the gut that was unable to sustain  
146 the normal density of bacterial populations in the absence of PGRP-SA/Toll signalling. The *Drosophila*  
147 homologue of 4E-BP has been shown to be activated by infections that trigger Toll signalling and has  
148 NF- $\kappa$ B binding sites in its promoter (Bernal and Kimbrell, 2000). Such infections include *C. albicans*  
149 and 4E-BP null mutants are susceptible to this particular immune challenge (Levitin et al, 2007).  
150 Induction of 4E-BP activity can shift the balance towards translation of uncapped mRNAs including  
151 those of AMPs (Kang et al, 2017) and decelerate fat metabolism (Teleman et al, 2005). Indeed, *C.*  
152 *albicans* infection of 20-day old flies induced a 4E-BP transcription reporter construct (Bernal and  
153 Kimbrell 2000) in ECs but not in progenitor cells (Fig 5A). This induction was significantly higher than  
154 injection of sterile PBS or the non-infected control (homeostasis) (Fig. 5B). 4E-BP transcriptional  
155 induction was also observed following *Staphylococcus aureus* (*S. aureus*) infection again in ECs (Fig.  
156 6A). After immune challenge with *S. aureus*, the number of GFP+ marked progenitors were  
157 significantly increased as was transcription of 4E-BP (Fig. 6B). Importantly, Toll10B expression in  
158 progenitor cells emulated the above as it resulted also in the transcriptional upregulation of 4E-BP in  
159 ECs in a manner comparable to *C. albicans* as well as *S. aureus* infection (Fig. 7A). This increase was  
160 significantly higher than the non-infected control (Fig. 7B).

161           Increase of 4E-BP transcription had an effect on fat metabolism as reported previously  
162 (Teleman et al, 2005). 48h after *C. albicans* infection, 20-day old control flies had elevated fat levels  
163 when normalised to total body protein (Fig. 8). This increase became more prominent when  
164 considering intestinal-only triglycerides (TGs) (Fig. S8). This indicated that systemic infection in  
165 *Drosophila* adults resulted in increased intestinal accumulation of TGs and increased systemic levels  
166 of fat. Infection of 4E-BP null mutants or flies with silenced 4E-BP in ECs through the *NP1-GAL4*,  
167 *GAL80<sup>ts</sup>* (*NP1<sup>ts</sup>>4E-BP*) configuration did not produce this phenotype (Fig. 8, Fig. S8). Overexpression  
168 of Toll10B in progenitor cells had a similar effect as *C. albicans* infection but this was suppressed in a  
169 4E-BP null genetic background indicating that fat levels were controlled by 4E-BP (Fig. 8, Fig. S8). In

170 the absence of infection, loss of Toll signalling (*PGRP-SA<sup>semi</sup>* mutants) resulted in significantly  
171 reduced fat levels in 20-day but not in 5-day old flies (Fig. 9). The latter had the same levels of fat as  
172 the controls (Fig. 9). Reduction of fat was accompanied by a reduction in intestinal CFUs (Fig. S9). It  
173 has been established that TOR-mediated phosphorylation keeps 4E-BP activity suppressed (Hay and  
174 Sonenberg 2004). 20-day old PGRP-SA mutant flies with TOR-RNAi in ECs or treated with the mTOR  
175 inhibitor rapamycin restored fat quantities (Fig. 9) and CFUs (Fig. S9) to the level of the *yw* control.  
176 This suggested that loss of Toll signalling released TOR activity, which dampened 4E-BP's on lipid  
177 metabolism. When TOR activity was inhibited (pharmacologically or through RNAi) in *PGRP-SA*  
178 mutants, 4E-BP was able to put a brake on fat wasting and microbiota depletion. Indeed, treatment  
179 of PGRP-SA; 4E-BP double mutants or *PGRP-SA; NP1<sup>ts</sup>>4E-BP<sup>RNAi</sup>* flies with rapamycin was ineffective  
180 in restoring fat levels (Fig. 9) and intestinal CFUs (Fig. S9) indicating that 4E-BP was responsible for  
181 regulating fat levels and intestinal microbiota in ECs. As differences in food intake can modulate  
182 both lipid reserves as well as lifespan, we measured food intake during a week of observation (15 to  
183 22-day old mated female flies) using a capillary feeding assay (CAFE assay, Ja *et al*, 2007). Food  
184 intake was statistically indistinguishable between PGRP-SA and 4E-BP single mutants or PGRP-SA; 4E-  
185 BP double mutants compared to *yw* controls (Fig. S10).

186 Long-term intestinal regeneration is important for preserving organ function. In mice, the  
187 presence of TLR4 has been linked to increased proliferation of ISCs (Neal *et al*, 2012). However, the  
188 effect of the absence of TLRs has been less clear. Our results show that following infection as well as  
189 in the absence of immune challenge loss of Toll signalling blocked long-term epithelial renewal and  
190 reduced gut microbiota. Conversely, constitutive Toll in progenitor cells increased EB numbers by  
191 increasing ISC proliferation and blocking EBs to differentiate. More work is needed to pinpoint how  
192 this mechanism operates.

193 Infection or constitutive Toll in progenitor cells induced 4E-BP transcription in ECs. 4E-BP has  
194 been shown to preserve fat storage under stress conditions while loss of its activity resulted in flies  
195 "burning" fat faster (Teleman *et al*, 2005). Toll-mediated induction of 4E-BP in ECs increased both



196 intestinal and systemic fat levels. Conversely, fat reserves were depleted when Toll was similarly  
197 expressed but in a 4E-BP null genetic background or when 4E-BP was silenced in ECs.

198 Age-dependent loss of fat was also observed in the absence of infection in *PGRP-SA<sup>sem1</sup>*  
199 mutants. Reduction of fat levels was reversed with the use of rapamycin, which targets mTORC1  
200 (reviewed in Laplante and Sabatini, 2012) or by blocking mTOR by RNAi in ECs. This result suggested  
201 that absence of Toll signalling elevated mTORC1 activity, which in turn dampened 4E-BP (Hay and  
202 Sonenberg 2004). In keeping with this hypothesis *PGRP-SA; 4E-BP* or *PGRP-SA; NP1<sup>ts</sup>>4E-BP<sup>RNAi</sup>* flies  
203 treated with rapamycin were unable to restore fat levels. This indicated that systemic fat levels were  
204 under 4E-BP control in ECs downstream of Toll. The latter antagonised TOR in the regulation of fat  
205 metabolism through 4E-BP.

206 It is tempting to speculate that in the absence of infection, PGRP-SA recognises parts of the  
207 intestinal microbiota and as such activates the Toll pathway in progenitor cells, which in turn keeps  
208 4E-BP activity in enterocytes thus preserving fat levels that are important for normal microbiota  
209 population density. Indeed, we have observed that 4E-BP is important for the maintenance of  
210 normal CFUs in the gut and we believe that it is the preservation of fat levels through 4E-BP that  
211 mediates the maintenance of a normal microbiota population density. In this context, PGRP-SA  
212 function resembles intestinal TLR-2, Myd88-mediated responses in the T-cell compartment of the  
213 mouse gut (Kubinak et al, 2015). More work is needed to pinpoint, which constituent(s) of the  
214 microbiota PGRP-SA may recognise and how the signal is transmitted from the progenitor cells to  
215 ECs.

216 Our data support a model where systemic immunity to infection is directly linked to  
217 epithelial renewal and intestinal regulation of fat levels through the evolutionary conserved Toll  
218 receptor. This ties together the immune and metabolic aspects of intestinal physiology with long-  
219 term epithelial and microbiota homeostasis.

220

221 **Materials and Methods:**

222 **Fly strains.** The genetic backgrounds control strains used in the experiments are *yw*. We  
223 incorporated the *PGRP-SA<sup>sem1</sup>* mutation (Michel *et al*, 2001) in *esg<sup>ts</sup>>GAL4* (Buchon *et al*, 2009). We  
224 used the *spz<sup>rm7</sup>* mutant (de Gregorio *et al*, 2002) and incorporated UAS-CG7923<sup>RNAi</sup>, UAS-9080<sup>RNAi</sup>  
225 and UAS-Toll<sup>RNAi</sup> in *esg<sup>ts</sup>>GAL4* and *Su[H]<sup>ts</sup>>GAL4* (Zeng *et al*, 2010). All RNAi strains were obtained  
226 from the Vienna Stock Centre (Dietzl *et al*, 2007). Thor-lacZ (*y',w\**; p{lacW}Thor<sup>K13517</sup>) and Thor<sup>2</sup>  
227 was obtained from Bloomington Stock Centre IN USA (# BL 9558 and # BL 9559 respectively). For Toll  
228 constitutive expression we used UAS-Toll10B (Shia *et al*, 2009).

229

230 **Infection.** To infect flies, *Candida albicans* (*C. albicans*) strain was cultured in Sabouraud's glucose  
231 broth (SGB; Oxoid) for 18 hours; cells were harvested by centrifugation (3200 rpm for 5 minutes) and  
232 washed in sterile phosphate buffered saline (PBS). Washed fungal cells were again centrifuged and  
233 re-suspended in PBS to an optical density of approximately 0.95- 1.05 (Thermo Scientific NanoDrop  
234 1000 spectrophotometer). The inoculant containing *C. albicans* strain was further diluted four-fold in  
235 PBS. Similarly, *Staphylococcus aureus* (*S. aureus*) NCTC8325-4 was cultured in TSB for 16 hours; cells  
236 were harvested by centrifugation (4000 rpm for 7 minutes) and washed in PBS. Cells were then  
237 centrifuged and re- suspended in PBS to an optical density of approximately 0.360 and further  
238 diluted 1000-fold in PBS for injection. Anaesthetized female flies were infected with 13.2nl of the *C.*  
239 *albicans* or *S. aureus* suspensions (or with PBS control), directly injected into the haemolymph  
240 through the dorsolateral region of the thorax, using a micro-injector (Drummond Scientific  
241 Nanoinject II). The number of viable yeast cells injected per fly was approximately 600, as calculated  
242 from plating homogenates of six injected flies, previously ground in SGB medium. Flies were kept at  
243 30°C post-infection for 36 hours and then dissected.

244

245 **Gut dissection and immunostaining.** For gut imaging, guts from anesthetized flies were dissected in  
246 Schneider's medium and fixed for 30 min in 4% paraformaldehyde (in PBS), rinsed in PBS and then  
247 three times washed (5 min each) in wash solution, 0.1% Triton X-100 (Sigma-Aldrich) in PBS. The

248 tissue was blocked for 60 min in blocking solution (0.1% Triton X- 100, 2% BSA (Sigma-Aldrich) in PBS  
249 and immunostained with primary antibodies overnight at 4°C. Samples were then washed 4 x 5 min  
250 at room temperature (RT) In wash solution, incubated with secondary antibodies at RT for 2 hours,  
251 washed again as before and were them stained with DAPI 1:1000 (Sigma-Aldrich). Washed guts were  
252 mounted in slides with vectorshield mounting media (Vector Laboratories). The following primary  
253 antibodies were used: mouse anti- $\beta$ - galactosidase (40-1a-S, Developmental Studies Hybridoma  
254 Bank, Iowa, USA) - 1:1000; goat anti-HRP (123-165-021, Jackson ImmunoResearch Labs. Inc.)-1:500.  
255 we used donkey anti-mouse Alexa 568 antibody (Invitrogen) - 1:250 and donkey anti- goat Alexa 568  
256 antibody (Invitrogen) - 1:250.

257

258 **Imaging data analysis.** Guts were imaged at 20x magnification, and all GFP marked cells (*esg > Gal4*)  
259 co-localised with DAPI small nuclei were counted in an area of approximate size that extended  
260 anteriorly from Boundary 2-3 (Buchon N et al; Cell Reports, 2013); plotted values are the number of  
261 GFP marked cells per unit area or per total number of DAPI stained cells. Images were analysed using  
262 ImageJ software.

263

264 **Microbiota analysis.** At the indicated age-points six female flies from each of three different vials,  
265 each containing approximately 20 flies, were assayed for total microbiota load. The microbiota load  
266 was determined both by plating fly extracts and by PCR amplification of the 16S ribosomal RNA gene  
267 from DNA obtained from dissected guts. The remaining flies were transferred to fresh vials every  
268 two days. Flies were first washed with cold ethanol (70%) and then rinsed in PBS. Flies were  
269 homogenized in M.R.S broth, the extract dilutions were then spread on 229 M.R.S agar and the  
270 plates were incubated at 30°C. After 48 hours, colonies were counted. For PCR assay, total DNA was  
271 extracted from dissected midguts (crop and hindgut were removed) using a G hypodermic needle  
272 attached to a homogenizer and using the Cells and Tissue DNA Isolation Kit (NORGEN). The 16S  
273 region PCR amplification was carried out for 10ng of each DNA sample, using 50 $\mu$ l reaction mixtures.

274 The primer sequences used were AGAGTTTGATCCTGGCTCAG (16S\_27\_Fw) and  
275 GGTTACCTTGTTACGACTT (16S\_1492\_Rv). A 482bp fragment from actin was also amplified in these  
276 reactions as an internal control. The primer sequences used were CTGGACTTCGAGCAGGAGAT  
277 (Act5C3\_Fw) and GGTGGCTTGGATGCTTAGAA (Act5C2\_Rv). Each reaction mixture contained 0.5µM  
278 of each primer, a 200µM concentration of each deoxynucleoside triphosphate (dNTP), and 1µM  
279 Phusion Taq polymerase (New England Biolabs). The PCR conditions 236 involved an initial  
280 denaturation step at 98°C for 30 secs followed by 35 cycles of 95°C for 30 secs, 65°C for 30 sec, and  
281 72°C for 1 min and ended with an extension step at 72°C for 5 min in a thermocycler (T100 thermal  
282 cycler, Bio-Rad). PCR samples were run in a 0.8% agarose gel. The gel was stained with ethidium  
283 bromide, visualized and digitally photographed by Alphalimager HP Gel (Alpha 240 Innotech)  
284 imaging system. The bands intensities were analysed in Image J.

285

286 **Triglyceride measurement** This was done as in Teleman et al, 2005. Briefly, newly hatched L1 larvae  
287 were seeded in vials as at density of 50/vial and grown at 25°C to synchronise the culture. Adults at  
288 the appropriate age were processed in batches of eight for males and six for females. Only male data  
289 are presented (of note that females did not deviate from the results obtained). Samples were  
290 processed immediately in homogenisation buffer [0.05% Tween-20 and 2x protease inhibitor  
291 (Roche) in H<sub>2</sub>O]. After centrifugation (5000 rpm, 1min) the supernatant was transferred to a new  
292 tube and spun again (14000 rpm, 3mins at 4°C). To measure triglycerides 80µl of the above  
293 supernatant were mixed with 1ml of the Triglyceride Reagent (Thermo-Fisher) and incubated for  
294 10mins at 37°C. Measurements were taken at OD 520 and compared with a standardization curve.  
295 To measure protein levels, 100µl of the final supernatant was combined with 700µl of H<sub>2</sub>O and  
296 200µl of Bio-Rad Protein Assay Reagent and incubated at room temperature for 3mins.  
297 Measurements at OD<sub>595</sub> were compared with a standardization curve.

298

299 **Rapamycin feeding protocol.** Fly food was microwaved and Rapamycin antibiotic- or ethanol as  
300 vehicle control was added to a final concentration of 200  $\mu$ M (rapamycin is soluble in EtOH,  
301 rapamycin was Sigma 37094-10MG). The mix was then added to vials in batches of 10mls. We  
302 cultured female flies of the appropriate age (20 flies per vial) in vials containing rapamycin or  
303 ethanol treated food. Food was changed every two days for two weeks. When flies reached 20 days  
304 of age we sacrificed them and performed downstream experiments (fat level measurements or  
305 CFUs).

306

307 **Capillary Feeding Assay (CAFE assay)** Food intake was analysed as previously described (Ja *et al*,  
308 2007) with some modifications. 50 flies per genotype were tested. Batches of 10 flies were placed in  
309 vials with wet tissue paper at the bottom and a capillary food source containing a blue dye. Feeding  
310 was monitored for 8 hours (light ON) and 1 hour (light OFF). Feeding amount was recorded every 1  
311 hour and the capillaries were replaced every 2 days.

312

313 **Statistical analysis.** Data was analysed using GraphPad Prism 6 or R. First a D' Agostino and Pearson  
314 omnibus Normality test was conducted. If the data was found to fit a normal distribution, parametric  
315 tests were used, first ANNOVA and then a Tukey's multiple comparisons test. For the Thor-LacZ  
316 count data in the cases that did not fit the normal distribution we conduct Kruskal-Wallis test for the  
317 followed by the Dunn's multiple comparisons test to clarify the significance. R was used to analyse  
318 the GFP count data, it was fitted to a generalised linear model using a quasi-Poisson regression and  
319 then

320 ANNOVA and Tukey's multiple comparisons tests were employed to look for significance. For qPCR  
321 gene expression data was standardized by series of sequential corrections, including log  
322 transformation, mean centring, and autoscaling (Willems *et al*, 2008).

323

324 **Acknowledgements:** We would like to thank the Vienna and Bloomington Stock Centres, as well as  
325 Bruno Lemaitre for fly stocks and the Iowa Hybridoma Bank for antibodies. This work was funded by  
326 ERC Consolidator Grant 310912 and BBSRC Responsive Mode Grant BB/P005691/1 (both to PL).

327

328 **References:**

329 Akira S and Takeda K (2004). Toll-like receptor signalling Nature Reviews Immunology 4, 499–511.

330 Amcheslavsky A, Jiang J, Ip YT (2009). Tissue damage-induced intestinal stem cell division in  
331 *Drosophila*. Cell Stem Cell 4, 49-61.

332 Bernal A, Kimbrell DA (2000). *Drosophila* Thor participates in host immune defence and connects a  
333 translational regulator with innate immunity. Proc Natl Acad Sci 97, 6019-6024.

334 Buchon N, Broderick NA, Chakrabarti S, Lemaitre B (2009). Invasive and indigenous microbiota  
335 impact intestinal stem cell activity through multiple pathways in *Drosophila*. Genes Dev. 23, 2333-  
336 2344.

337 Chang C-I, Pili-Flouri S, Herve M, Parquet C, Cheillah Y, *et al.* (2004). A *Drosophila* pattern recognition  
338 receptor contains a peptidoglycan docking groove and unusual L,D-carboxypeptidase activity. PLoS  
339 Biol. 2, E277.

340 Daigneault J, Klemetsaune L, Wasserman SA (2013). The IRAK homologue Pelle is the functional  
341 counterpart of the I $\kappa$ B kinase in the *Drosophila* Toll pathway PLoS ONE 8, e75150.

342 De Gregorio E, Spellman PT, Tzou P, Rubin GM, Lemaitre B (2002) The Toll and Imd pathways are the  
343 major regulators of the immune response in *Drosophila*. EMBO J, 21, 2568-2579.

344 Dietzl G, Chen D, Schnorrer F, Su KC, Feliner M *et al* (2007). A genome-wide transgenic RNAi library  
345 for conditional gene inactivation in *Drosophila*. Nature 448, 151-156.

346 Han H, Pan C, Liu C, Lv X, Yang X *et al* (2015). Gut-neuron interaction via Hh signalling regulates  
347 intestinal progenitor cell differentiation in *Drosophila*. Cell Discov 1, 15006.

348 Hay and Sonenberg (2004). Upstream and downstream of mTOR. Genes Dev 18, 1926-1945.

349 Ja WW, Carvalho GB, Mak EM, de la Rosa NN, Fang AY *et al* (2007) Prandiology of *Drosophila* and the  
350 CAFE assay. Proc Natl Acad Sci USA 104, 8253-8256.

351 Jia K, Chen D, Riddle DL (2004). The TOR pathway interacts with the insulin signalling pathway to  
352 regulate *C. elegans* larval development, metabolism and lifespan. Development 131, 3897-3906.

353 Jiang I-H, Chosa N, Kim S-H, Nam H-J, Lemaitre B *et al* (2006). A Spätzle-processing enzyme required  
354 for Toll signalling activation in *Drosophila* innate immunity. Dev Cell 10, 45-55.

355 Kang MJ, Vasudevan D, Kang K, Kim K, Park J-E *et al* (2017). 4E-BP is a target of the GCN2-ATF4  
356 pathway during *Drosophila* and ageing. J Cell Biol 216, 115-119.

357 Kounatidis I and Ligoxygakis P (2012). *Drosophila* as a model system to unravel the layers of innate  
358 immunity to infection. Open Biology doi: 10.1098/rsob.120075

359 Koubinak JL and Round JL (2012) Toll-like receptors promote mutually beneficial commensal-host  
360 interactions. PLoS Path 8, e1002785.

361 Kubinak JL, Petersen C, Stephens WZ, Soto R, Bake E *et al* (2015) Myd88 signalling in T-cells directs  
362 IgA-mediated control of the microbiota to promote health. Cell Host & Microbe 17, 153-163.

363 Laplante M, Sabatini DM (2012) mTOR signalling in growth control and disease. Cell 149, 274-293.

364 Lemaitre B, Miguel-Aliaga I (2013). The digestive tract of *Drosophila melanogaster*. Annu Rev Genet.  
365 47, 377-404.

366 Levitin A, Marcil A, Tettweiler G, Laforest MJ, Oberholzer U *et al* (2007). *Drosophila melanogaster*  
367 Thor and response to *Candida albicans* infection. Eukaryotic Cell 6, 658-663.

368 Marek LR, Kagan JC (2012) Phosphoinositide Binding by the Toll Adaptor dMyD88 Controls  
369 Antibacterial Responses in *Drosophila* Immunity, 36, 612-622

370 Michel T, Reichhart J-M, Hoffmann JAH, Royet J (2001). *Drosophila* Toll is activated by Gram-positive  
371 bacteria through a circulating peptidoglycan recognition protein. Nature 414, 756–759.

372 Miron M, Verdu J, Lachance PE, Birnbaum MJ, Lasko PF *et al* (2001). The translational inhibitor 4E-BP  
373 is an effector of PI(3)K/Akt signalling and cell growth in *Drosophila*. Nat Cell Biol 3, 596-601.

374 Neal MD, Sodhi CPS, Hongpeng J, Dyer M, Egan CE et al (2012) Toll-like Receptor 4 Is Expressed on  
375 Intestinal Stem Cells and Regulates Their Proliferation and Apoptosis via the p53 Up-regulated  
376 Modulator of Apoptosis. *Journal of Biological Chemistry* 287, 37296-37308.

377 O'Brien LE, Soliman SS, Li X, Bilder D (2011). Altered model of stem cell division drive adaptive  
378 intestinal growth. *Cell* 147, 603-614.

379 Ohlstein B, Spradling A (2006). The adult *Drosophila* posterior midgut is maintained by pluripotent  
380 stem cells. *Nature* 439, 470-474.

381 Ohstein B, Spradling A (2007). Multipotent *Drosophila* intestinal stem cells specify daughter fates by  
382 differential Notch signalling. *Science* 315, 9880992.

383 Shia AKH, Glittenberg M, Thompson G, Weber AN, Reichhart J-M, Ligoxygakis P (2009). Toll-  
384 dependent antimicrobial responses in *Drosophila* larval fat body require Spaetzle secreted by  
385 haemocytes. *J Cell Sci.* 122, 4505-4515.

386 Suster ML, Seugnet L, Bate M, Sokolowski MB (2004). Refining GAL4-driven transgene expression in  
387 *Drosophila* with a GAL80 enhancer trap. *Genesis* 39, 240-245.

388 Teleman AA, Chen Y-W, Cohen SM (2005) 4E-BP functions as a metabolic brake used under stress  
389 conditions but not during normal growth. *Genes Dev* 19, 1844-1848.

390 Tettweller G, Miron M, Jenkins M, Sonenberg N, Lasko PP (2005). Starvation and oxidative stress  
391 resistance in *Drosophila* are mediated through the eIF4E-binding protein, d4E-BP. *Genes Dev* 19,  
392 1840-1843.

393 Weber AN, Tauszig-Delamasure S, Hoffmann JAH, Lelievre E, Gascan H et al (2003). Binding of  
394 *Drosophila* cytokine Spaetzle to Toll is direct and established signalling. *Nature Immunology* 4, 794-  
395 800.

396 Willems E, Leyns L, Vandesompele J (2008) Standardization of real-time PCR gene expression data  
397 from independent biological replicates. *Anal Biochem* 379, 127-129.

398 Zeng X, Chauhan C, Hou S X (2010) Characterization of midgut stem cell and enteroblast specific  
399 GAL4 lines in *Drosophila*. *Genesis* 48, 607-611.



400

401 **FIGURE LEGENDS**

402 **Figure 1. Intestinal progenitor cells respond to systemic *C. albicans* infection.** Focusing on an area  
403 of the anterior midgut close to the border with middle midgut (**A**) we found a significant increase in  
404 large GFP-positive cells (green) found in *esg<sup>ts</sup>GFP* intestines following injection by *C. albicans* in the  
405 thorax compared to sterile injury with PBS (**B**). This was mimicked in the absence of infection or  
406 injury by the expression of a constitutively active form of the Toll receptor (Toll10B) when expressed  
407 in progenitor cells (*esg-Gal4*) or just in EBs [*Su(H)-Gal4*] and compared to expression of nlsGFP (**C**).  
408 This implies that the large GFP cells seen in (**B**) were EBs. All nuclei were stained with DAPI (grey). In  
409 the plots, each circle represents the counted area from a single gut; 95% confidence interval is  
410 displayed (\* ( $p < 0.05$ ), \*\*\* ( $p < 0.001$ ), ns = non-significant).

411 **Figure 2. Silencing Toll in intestinal progenitor cells prevents their increase during systemic**  
412 **infection. (A)** 36 hours following PBS injection or systemic *C. albicans* infection the number of ISCs /  
413 EBs (marked with GFP, green) increases (*UAS-CG7923<sup>RNAi</sup>*), but not when the function of Toll is  
414 reduced (*UAS-Toll<sup>RNAi</sup>*) specifically in these cells (*esg<sup>ts</sup>>Gal4*) (**B**). Systemic infection may also induce  
415 enhanced clustering (yellow asterisks) and morphological changes (compare white asterisks) to the  
416 ISCs / EBs, which are diminished when Toll receptor activity is reduced. All nuclei stained with DAPI  
417 (grey). Each circle represents a counted area from a single gut; 95% confidence interval is displayed.

418 **Figure 3. The Toll receptor influences the long-term renewal of gut progenitor cells in the absence**  
419 **of infection. (A)** RNAi knockdown of the *UAS-CG7923* was randomly chosen from the VDRC  
420 collection as a control for the RNAi effect. Using *UAS-Toll<sup>RNAi</sup>* (from the same VDRC collection) the  
421 Toll receptor was knocked-down specifically in ISCs and EBs (*esg-ts > Gal4*) of the adult gut. This led  
422 to altered morphology of progenitors, where the cells generally remained round, rarely adopting the  
423 characteristic elongated and irregular shape often observed with ISCs/EBs a reduction in cell number

424 and alters their morphology, where the cells generally remain rounded, rarely adopting the  
425 characteristic elongated and irregular shape often observed with ISCs / EBs (compare cells marked  
426 with white asterisks). **(B)** There was also a significant reduction in the numbers of progenitor cells  
427 when Toll is knocked-down [day 6 compared with day 20 - \*\*\* ( $p < 0.001$ )]. Each dot in the graph  
428 represents a counted area from a single gut taken from 3 biological repeats **(C)** Toll knocked-down  
429 resulted in a significant reduction of cultivable intestinal microbiota (CFUs) ( $p < 0.001$ ) in 20-day old  
430 flies; 95% confidence intervals are displayed.

431 **Figure 4. *PGRP-SA<sup>sem1</sup>* mutant flies have less intestinal progenitor cells.** **(A)** In the absence of  
432 infection, ISC (HRP positive, GFP positive) divide to produce EBs (HRP negative, GFP positive).  
433 However, in 20-day old flies that were deficient for PGRP-SA this division was not observed (see also  
434 insets). **(B)** Quantification of progenitor cells and ISCs showed that these were significantly reduced  
435 (\* $p < 0.05$ ; error bars display 95% confidence intervals, guts from 4 biological repeats were analysed).  
436 GFP expression was directed by the UAS dependent mCD8GFP transgene, which marked the cell  
437 membranes of the progenitor cells including ISCs and EBs (DAPI all nuclei).

438 **Figure 5. Systemic *C. albicans* infection activates d4E-BP (Thor) transcription in enterocytes.** **(A)**  
439 *thor-lacZ; esg<sup>ts</sup>>GFP* flies injected with *C. albicans* were sampled 36 hours post-infection and  
440 compared to non-treated (homeostasis) or those injected with PBS (sterile injury). Gut cells stained  
441 with DAPI (blue), anti- $\beta$ -galactosidase (red) and anti-GFP expressing cells (marking both ISCs and  
442 EBs). Shown are representative images from the anterior midgut taken at 63x. **(B)**. Quantification of  
443 *thor-lacZ* expression upon systemic infection. Intensity measured using ImageJ, subtraction of the  
444 background was performed for all the samples. Ten guts were analysed (approximately 50 cells  
445 analysed per gut), 95% confidence intervals displayed, \* $p < 0.05$ , \*\*\*  $p < 0.001$ .

446 **Figure 6. Systemic infection of *S. aureus* activates d4E-BP transcription in enterocytes.** **(A)** *thor-*  
447 *lacZ; esg<sup>ts</sup>>GFP* flies injected with *S. aureus* were sampled 36 hours post-infection and compared to

448 non-treated or those injected with PBS (sterile injury). Gut cells stained with DAPI (blue), anti- $\beta$ -  
449 galactosidase (red) and anti-GFP expressing cells (marking both ISCs and EBs). Shown are  
450 representative images from the anterior midgut taken at 63x. **(B)** Quantification of progenitor cells  
451 following *S. aureus* infection indicating that systemic bacterial infection can also increase the  
452 population of intestinal progenitor cells **(C)** Quantification of *thor-lacZ* expression upon systemic *S.*  
453 *aureus* infection. Intensity measured using ImageJ and subtraction of the background was  
454 performed for all the samples. Ten guts were analysed (approximately 50 cells analysed per gut),  
455 95% confidence intervals displayed, \* $p < 0.05$ , \*\*\*  $p < 0.001$ .

456 **Figure 7. Toll10B expressed in progenitor cells activates d4E-BP transcription in enterocytes. (A)**  
457 Flies injected with *C. albicans* were sampled 36 hours post-infection and compared to non-treated  
458 (homeostasis) or those expressing Toll10B. Gut cells stained with DAPI (blue), anti- $\beta$ -galactosidase  
459 (red) and anti-GFP expressing cells (marking both ISCs and EBs). Shown are representative images  
460 from the anterior midgut taken at 63x. Two left hand columns show *thor-lacZ* **(B)**. Quantification of  
461 *thor-lacZ*; *esg<sup>ts</sup>>GFP*; right column *thor-lacZ*; *esg<sup>ts</sup>>GFP* flies also express Toll10B transgene. **(B)**  
462 Quantification of *thor-lacZ* expression upon systemic infection. Intensity measured using ImageJ,  
463 subtraction of the background was performed for all the samples. Ten guts were analysed  
464 (approximately 50 cells analysed per gut), 95% confidence intervals displayed, \*\*\*  $p < 0.001$ .

465 **Figure 8. 4E-BP regulates systemic fat levels following infection or Toll over-expression in intestinal**  
466 **progenitor cells.** Following *C. albicans* infection systemic fat levels were increased (comparison  
467 between *yw* and *yw-C. albicans*  $p < 0.001$ ). The presence of d4E-BP ensured that fat levels are not  
468 “burnt” as fast during infection since Thor mutants (4E-BP-*C. albicans*) or flies with silenced 4E-BP in  
469 the ECs (*NP1<sup>ts</sup>>4E-BP-RNAi*) that were infected had significantly less fat (comparison between *yw-C.*  
470 *albicans* and 4E-BP or NP1ts>4E-BP-RNAi  $p < 0.001$ ). Toll overexpression in progenitor cells through  
471 *esg-GAL4* was able to increase fat levels (comparison between *yw-C. albicans* and Toll-10B is non-  
472 significant but between *yw* and Toll-10B  $p < 0.001$ ). However, in a genetic background mutant for 4E-

473 BP, Toll overexpression did not have an effect (comparison between *4E-BP-C. albicans* and Toll non-  
474 significant). Error bars represent standard deviation. Bars represent mean values from three  
475 independent experiments.

476 **Figure 9. PGRP-SA regulates 4E-BP and fat content in an age-dependent manner.** In the absence of  
477 infection, 20-day old (but not 5-day old) PGRP-SA mutants had significantly reduced fat levels  
478 (comparison between 20-day old *yw* and *PGPP-SA*  $p < 0.001$  but non-significant when comparing 5-  
479 day old flies). Lack of PGRP-SA increased mTOR activity since either treatment of *PGRP-SA* mutants  
480 with rapamycin or silencing mTOR in ECs of *PGRP-SA* deficient flies brought back normal fat levels  
481 (comparison between 20-day old *yw* and PGRP-SA-*rapamycin* or *PGRP-SA; NP1<sup>ts</sup>>mTOR-RNAi*  
482 statistically indistinguishable). This was dependent on 4E-BP however, since fat levels of PGRP-SA;  
483 4E-BP double mutants or *PGRP-SA; NP1<sup>ts</sup>>4E-BP-RNAi* were low and insensitive to rapamycin  
484 (comparison between 20-day old PGRP-SA-*rapamycin* and PGRP-SA; 4E-BP-*rapamycin* or *PGRP-SA;*  
485 *NP1<sup>ts</sup>>4E-BP-RNAi* is  $p < 0.001$  but the latter when compared to 20-day old PGRP-SA or 20-day old 4E-  
486 BP gives a non-significant comparison). This indicated that mTOR/4E-BP signalling in the gut  
487 influenced systemic fat levels. Error bars represent standard deviation. Bars represent mean values  
488 from three independent experiments.

489 **Figure S1. Toll signalling endorses ISC but not EB cell proliferation. (A)** Constitutive Toll signalling  
490 did not induce EB proliferation. *Su(H)<sup>ts</sup>>Toll10B* flies, which express the constitutively active Toll  
491 receptor variant Toll10B (green channel) did not activate proliferation as shown by the lack of  
492 staining for pH3 (red channel). All cells were stained with DAPI (blue channel). **(B)** Silencing Toll in  
493 ISCs with a *esg<sup>ts</sup>>UAS-Toll-RNAi* configuration prevented ISC proliferation 36h following *C. albicans*  
494 infection (lower panel) compared to control flies (upper panel).

495 **Figure S2. Silencing expression of Toll in EBs reduces their number. (A)** RNAi knockdown of the Toll  
496 receptor specifically in EBs [*Su(H)-Gal4*] of the adult gut leads to reduction in cell number and alters

497 their morphology, where the cells generally remain rounded, rarely adopting the characteristics  
498 elongated and irregular shape often observed with ISCs/EBs (compared cells marked with white  
499 asterisks). CG7923 RNAi line was randomly chosen from the VDRC library and used as an internal  
500 control for the RNAi effect. EBs marked with GFP (green) and all nuclei stained with DAPI (grey) in  
501 20-day old flies. **(B)** Quantification showed significant EB loss in the absence of Toll (95% confidence  
502 interval is displayed).

503 **Figure S3. Proliferation of ISCs is absent from the intestinal epithelium of *PGRP-SA<sup>semI</sup>* mutants.**

504 **(A)** Guts from 20-day old *ywPGRP-SA<sup>semI</sup>; esg<sup>ts</sup>>GFP* females were stained with anti-GFP (green  
505 channel), DAPI (blue channel) and anti-pH3 (red channel). This is a representative sample from n=10.  
506 **(B)** In contrast, *yw* flies were found to have a significantly higher number of ISCs proliferating  
507 (compare red channels).

508 **Figure S4. Loss of *spz* results in the reduction of ECs.** Staining of *esg<sup>ts</sup>>GFP; spz<sup>rm7</sup>* or *esg<sup>ts</sup>>GFP;*  
509 *spz<sup>rm7</sup>/+* with anti-GFP (to mark progenitor cells, upper panels) and DAPI (to distinguish ECs, lower  
510 panels) in 20-day intestines. The homozygous *spz<sup>rm7</sup>* flies exhibited significantly lower numbers of  
511 ECs than heterozygous *spz<sup>rm7</sup>* flies ( $p < 0.05$ , unpaired t-test). Each dot in the graph represents the  
512 average number of ECs from 15 guts as measured placing a square always the same size at a random  
513 point on the surface plane of the anterior midgut epithelium.

514 **Figure S5. Constitutive expression of Toll in progenitor cells rescues ISC numbers in the absence of**

515 ***PGRP-SA*.** **(A)** Expression of Toll10B in progenitor cells (*esg<sup>ts</sup>>Toll10B*) in a genetic background  
516 mutant for *PGRP-SA* recovers ISCs cell numbers; ISCs are labelled in red (HRP staining) while ISCs and  
517 EBs are labelled in green (GFP) in 20-day old flies. **(B)** This can be verified comparing the *yw* genetic  
518 background with the *PGRP-SA<sup>semI</sup>; esg<sup>ts</sup>>Toll10B* flies where ISC numbers were statistically  
519 indistinguishable; (\*\*  $p < 0.01$ ).

520 **Figure S6. Loss of Toll signalling results in loss of intestinal microbiota.** (A) Semi-quantitative PCR of  
521 16S rRNA shows an age-dependent reduction in total intestinal microbiota when comparing *yw* to  
522 *PGRP-SA<sup>sem1</sup>* or *Dif<sup>1</sup>* but no reduction in the internal control (actin). (B) Quantification showed a  
523 significant reduction in the quantities of 16S.

524 **Figure S7. Loss of PGRP-SA function reduces lifespan.** Both female and male flies with a deficiency  
525 in PGRP-SA function (carrying the *sem1* mutation) have a significantly reduced lifespan. Median  
526 lifespan of control *yw* females was 58 days vs. 20 days for *sem1* females while median lifespan of  
527 control *yw* males was 41 days vs. 18.5 for *sem1* males.

528 **Figure S8. Toll signalling regulates intestinal triglyceride levels through the TOR/4E-BP axis.**  
529 Following *C. albicans* infection, intestinal fat levels increase (comparison between *yw* and *yw-C.*  
530 *albicans*  $p < 0.001$ ). The presence of 4E-BP ensures that intestinal fat levels are not “burnt” as fast  
531 during infection since infected Thor mutants (*4E-BP-C. albicans*) or flies with silenced 4E-BP in the  
532 ECs (*NP1<sup>ts</sup>>4E-BP-RNAi*) have significantly less fat (comparison between *yw-C. albicans* and 4E-BP or  
533 *NP1<sup>ts</sup>>4E-BP-RNAi*  $p < 0.001$ ). Toll overexpression in progenitor cells through *esg-GAL4* increases  
534 intestinal fat levels (comparison between *yw-C. albicans* and Toll-10B is non-significant but between  
535 *yw* and Toll-10B  $p < 0.001$ ). However, in a genetic background mutant for 4E-BP, Toll overexpression  
536 does not have an effect (comparison between *4E-BP-C. albicans* and Toll non- significant). Error bars  
537 represent standard deviation. Bars represent mean values from three independent experiments.

538 **Figure S9. Toll signalling regulates intestinal microbiota levels through the TOR/4E-BP axis.** 20-day  
539 old *yw* flies display significantly more intestinal CFUs than *PGRP-SA<sup>sem1</sup>* mutants ( $p < 0.01$ ). Loss of  
540 CFUs can be rectified by treating *PGRP-SA<sup>sem1</sup>* with rapamycin. However, this is dependent on 4E-BP  
541 since treatment with rapamycin of a double *PGRP-SA; 4E-BP* mutant (or flies mutant for *PGRP-SA*  
542 and with 4E-BP silenced in ECs) have CFUs at the level of *PGRP-SA<sup>sem1</sup>*.

543 **Figure S10. Food intake is not influenced by lack of either PGRP-SA or/and 4E-BP function.** Food

544 consumption was measured by the CAFE method in mated females (as they had a better life

545 expectancy in PGRP-SA mutants see Fig. S6) from day 15 to day 22 of adulthood; n=5 vials (of 10 flies

546 each) per genotype; no comparison was statistically significant ( $p > 0.05$ , unpaired t-test).

547

**A**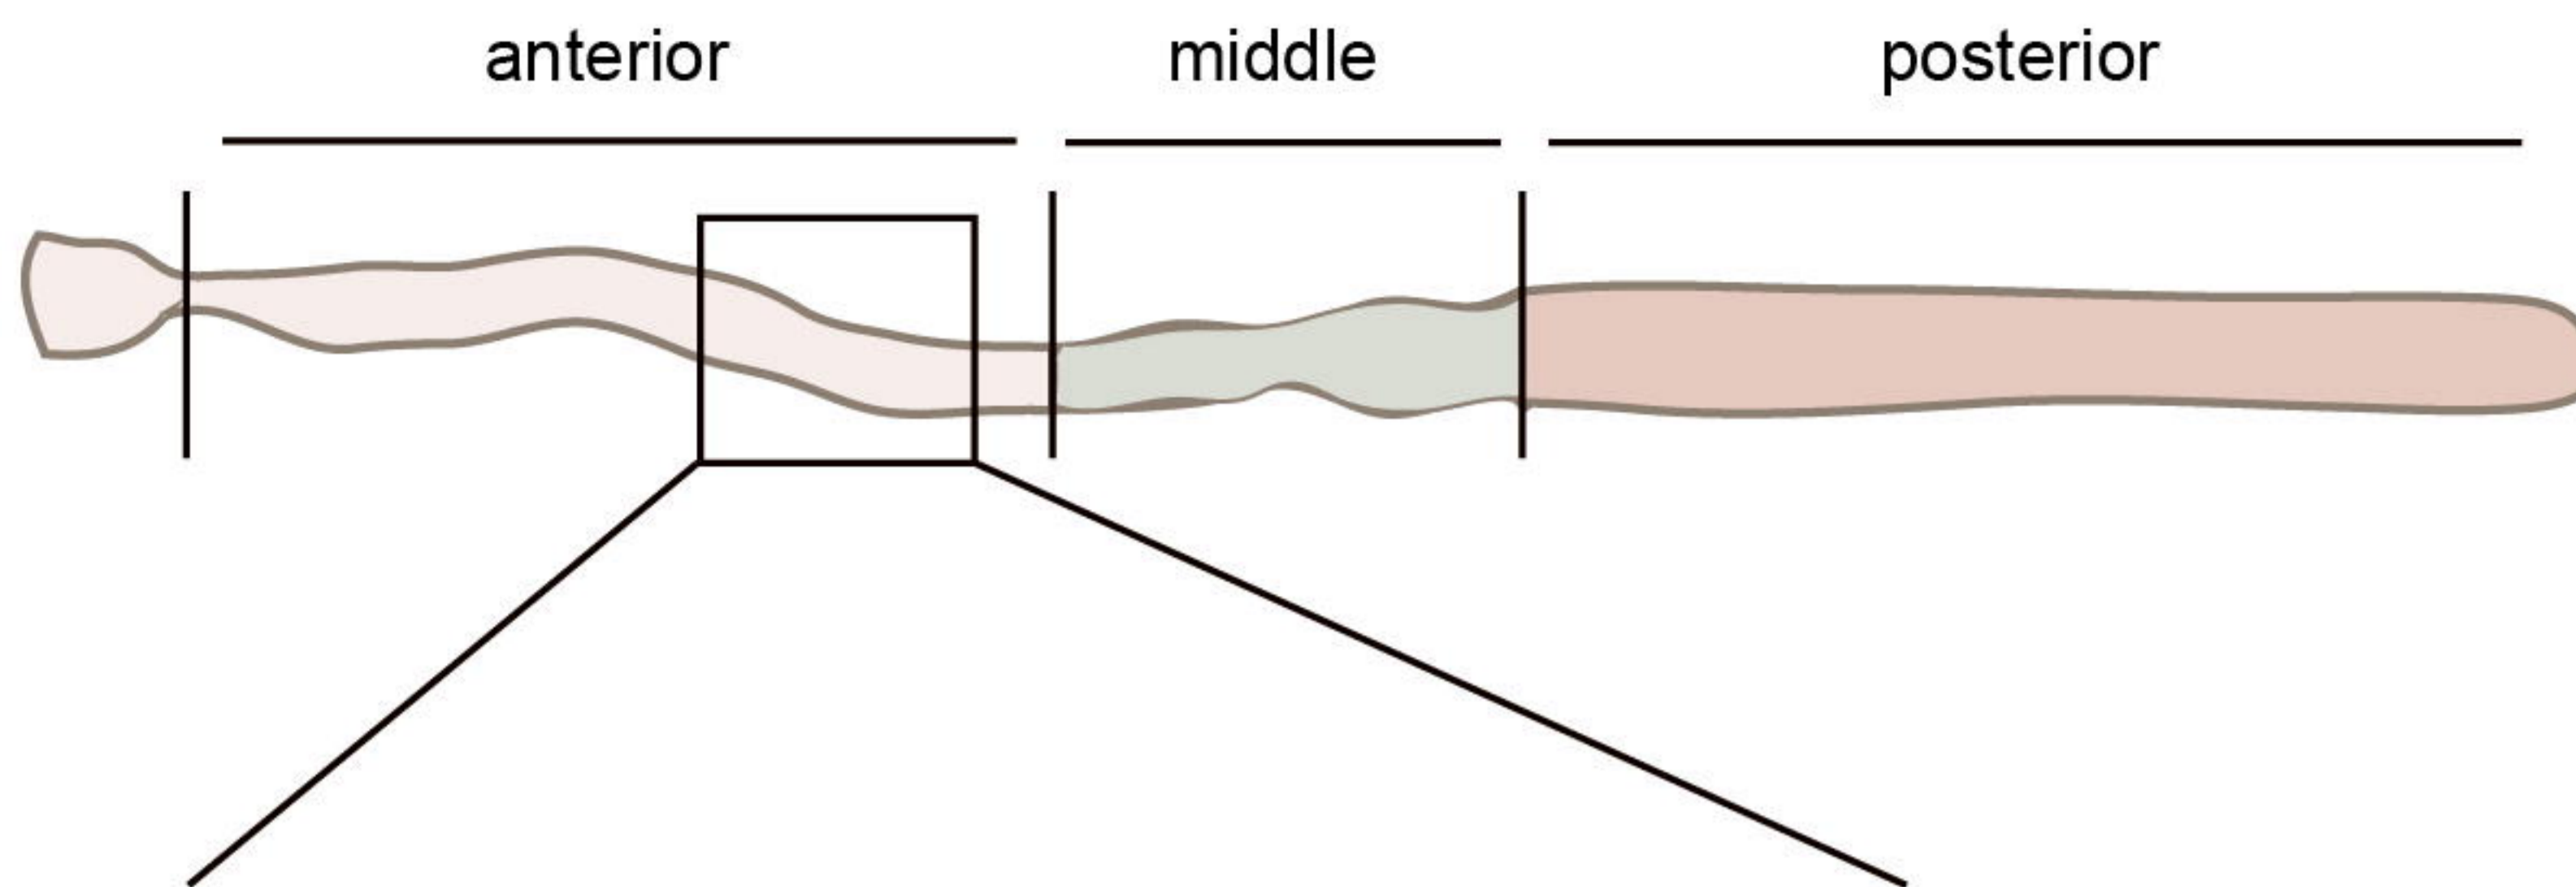**B**

Non-injected PBS *C. albicans*

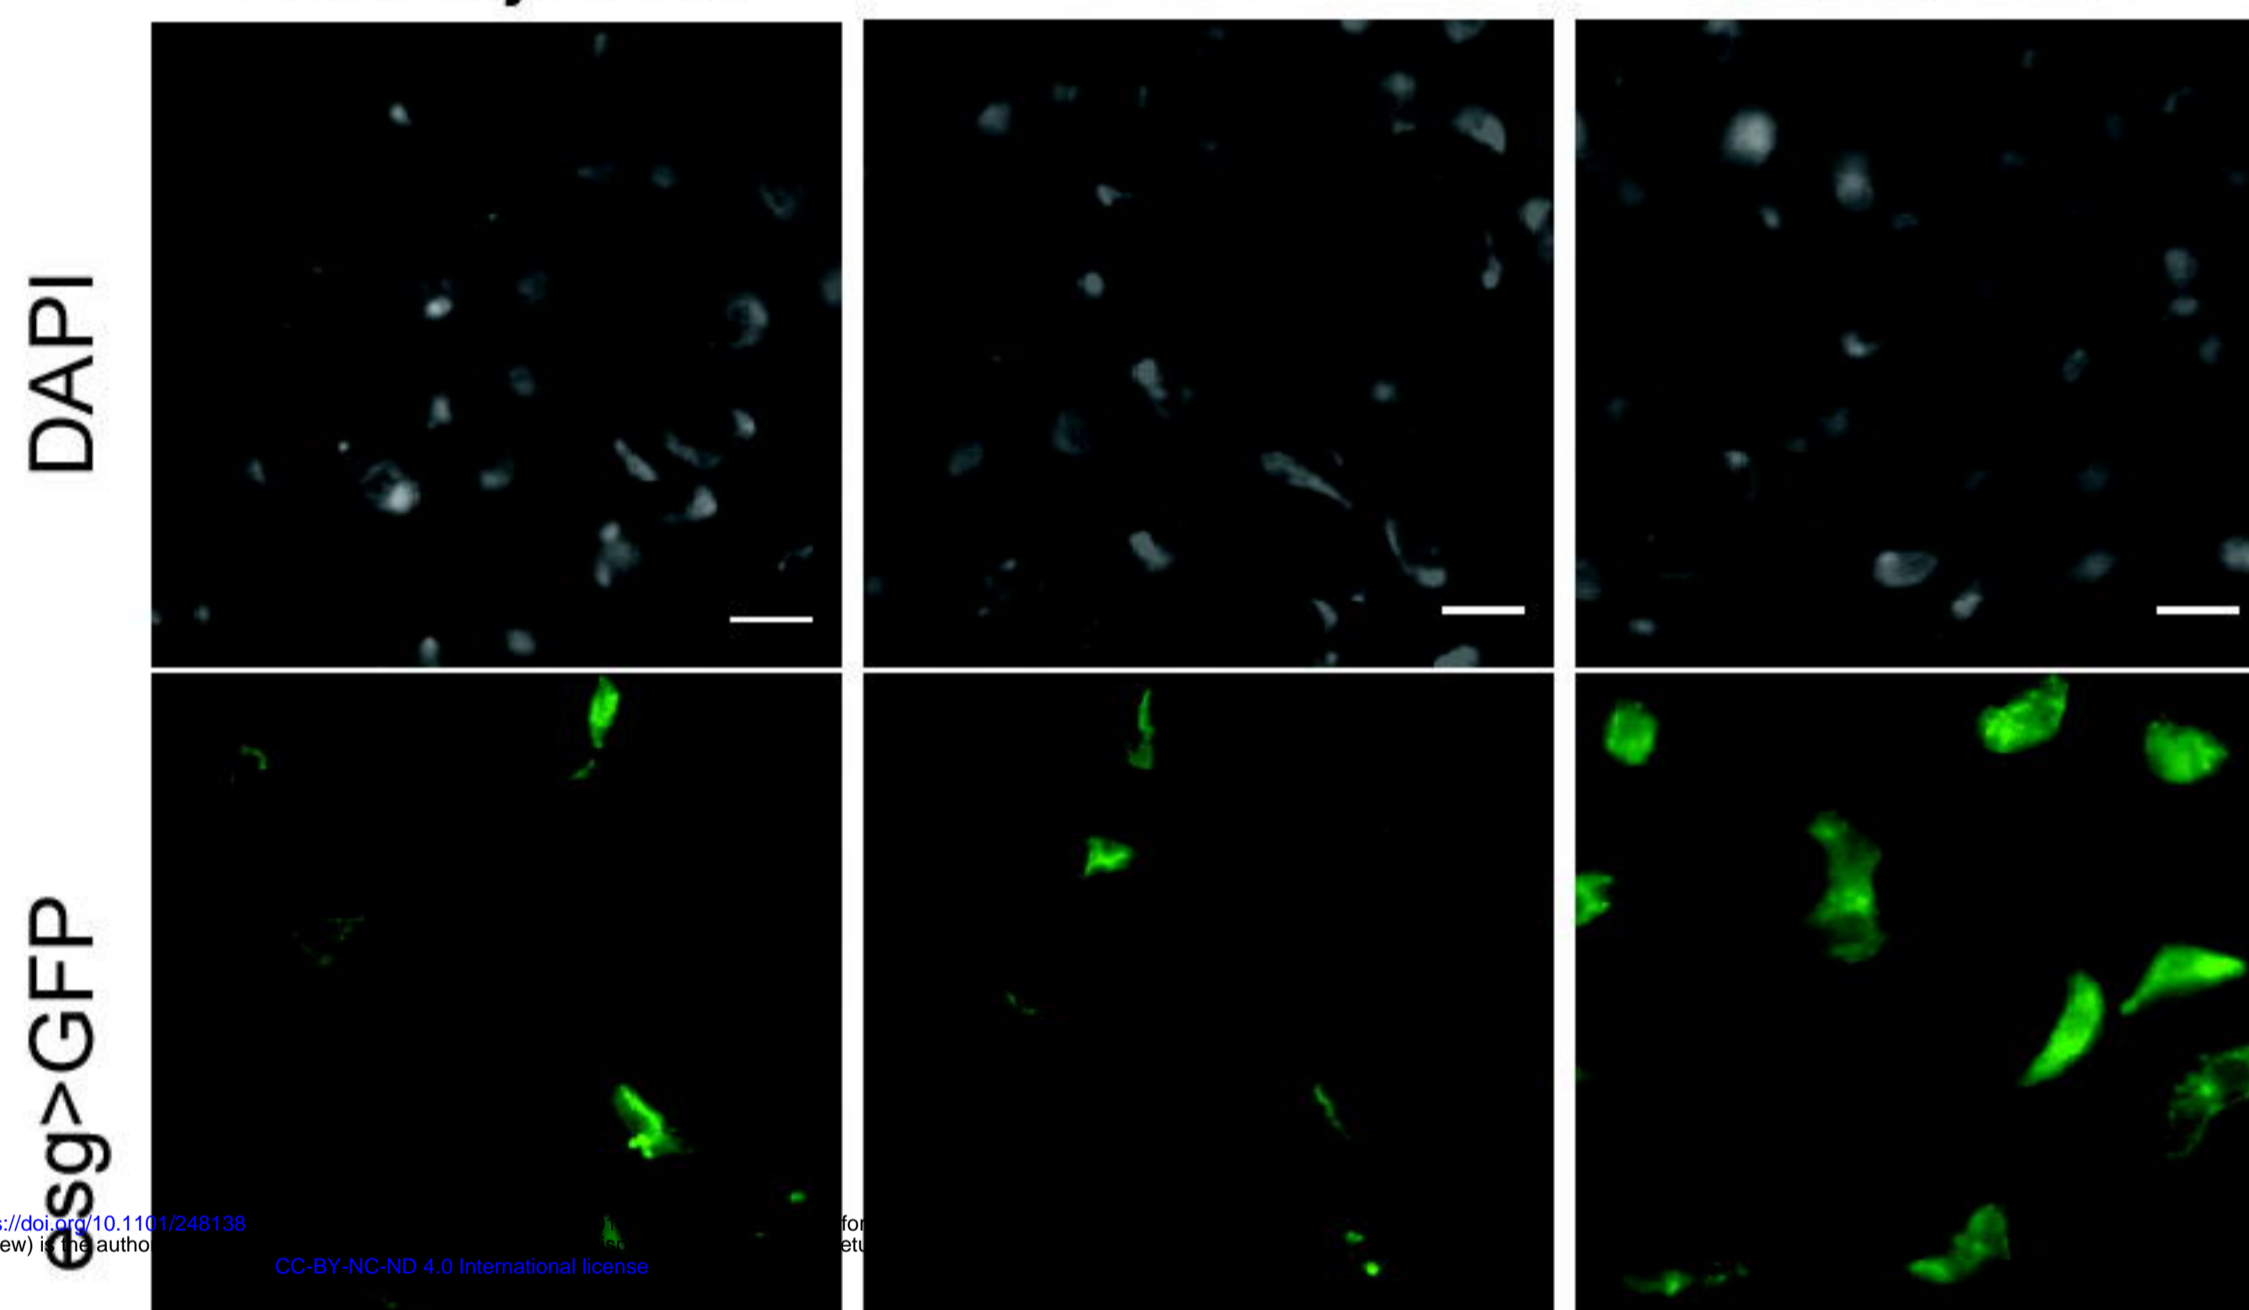

bioRxiv preprint doi: <https://doi.org/10.1101/248138>; this version posted October 1, 2018. The copyright holder for this preprint (which was not certified by peer review) is the author/funder, who has granted bioRxiv a license to display the preprint in perpetuity. It is made available under aCC-BY-NC-ND 4.0 International license.

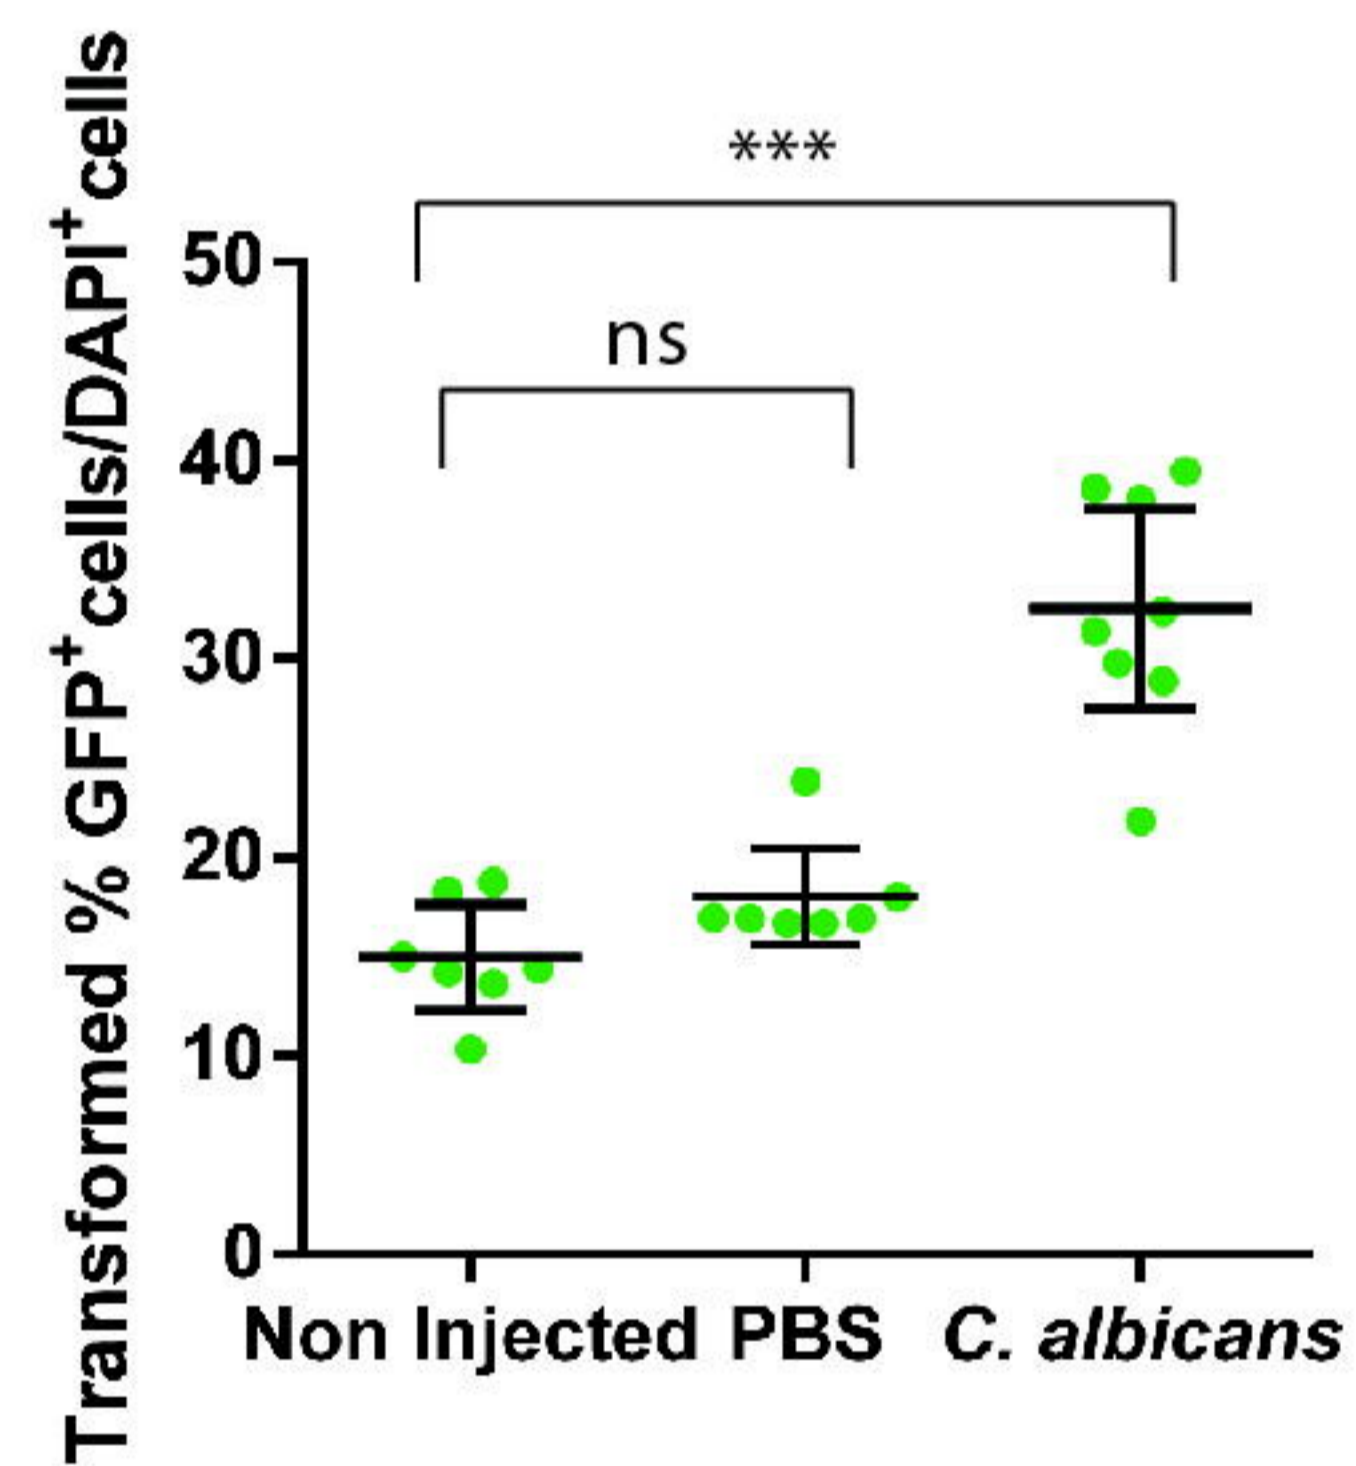**C**

Toll10B *nlsGFP* Toll10B

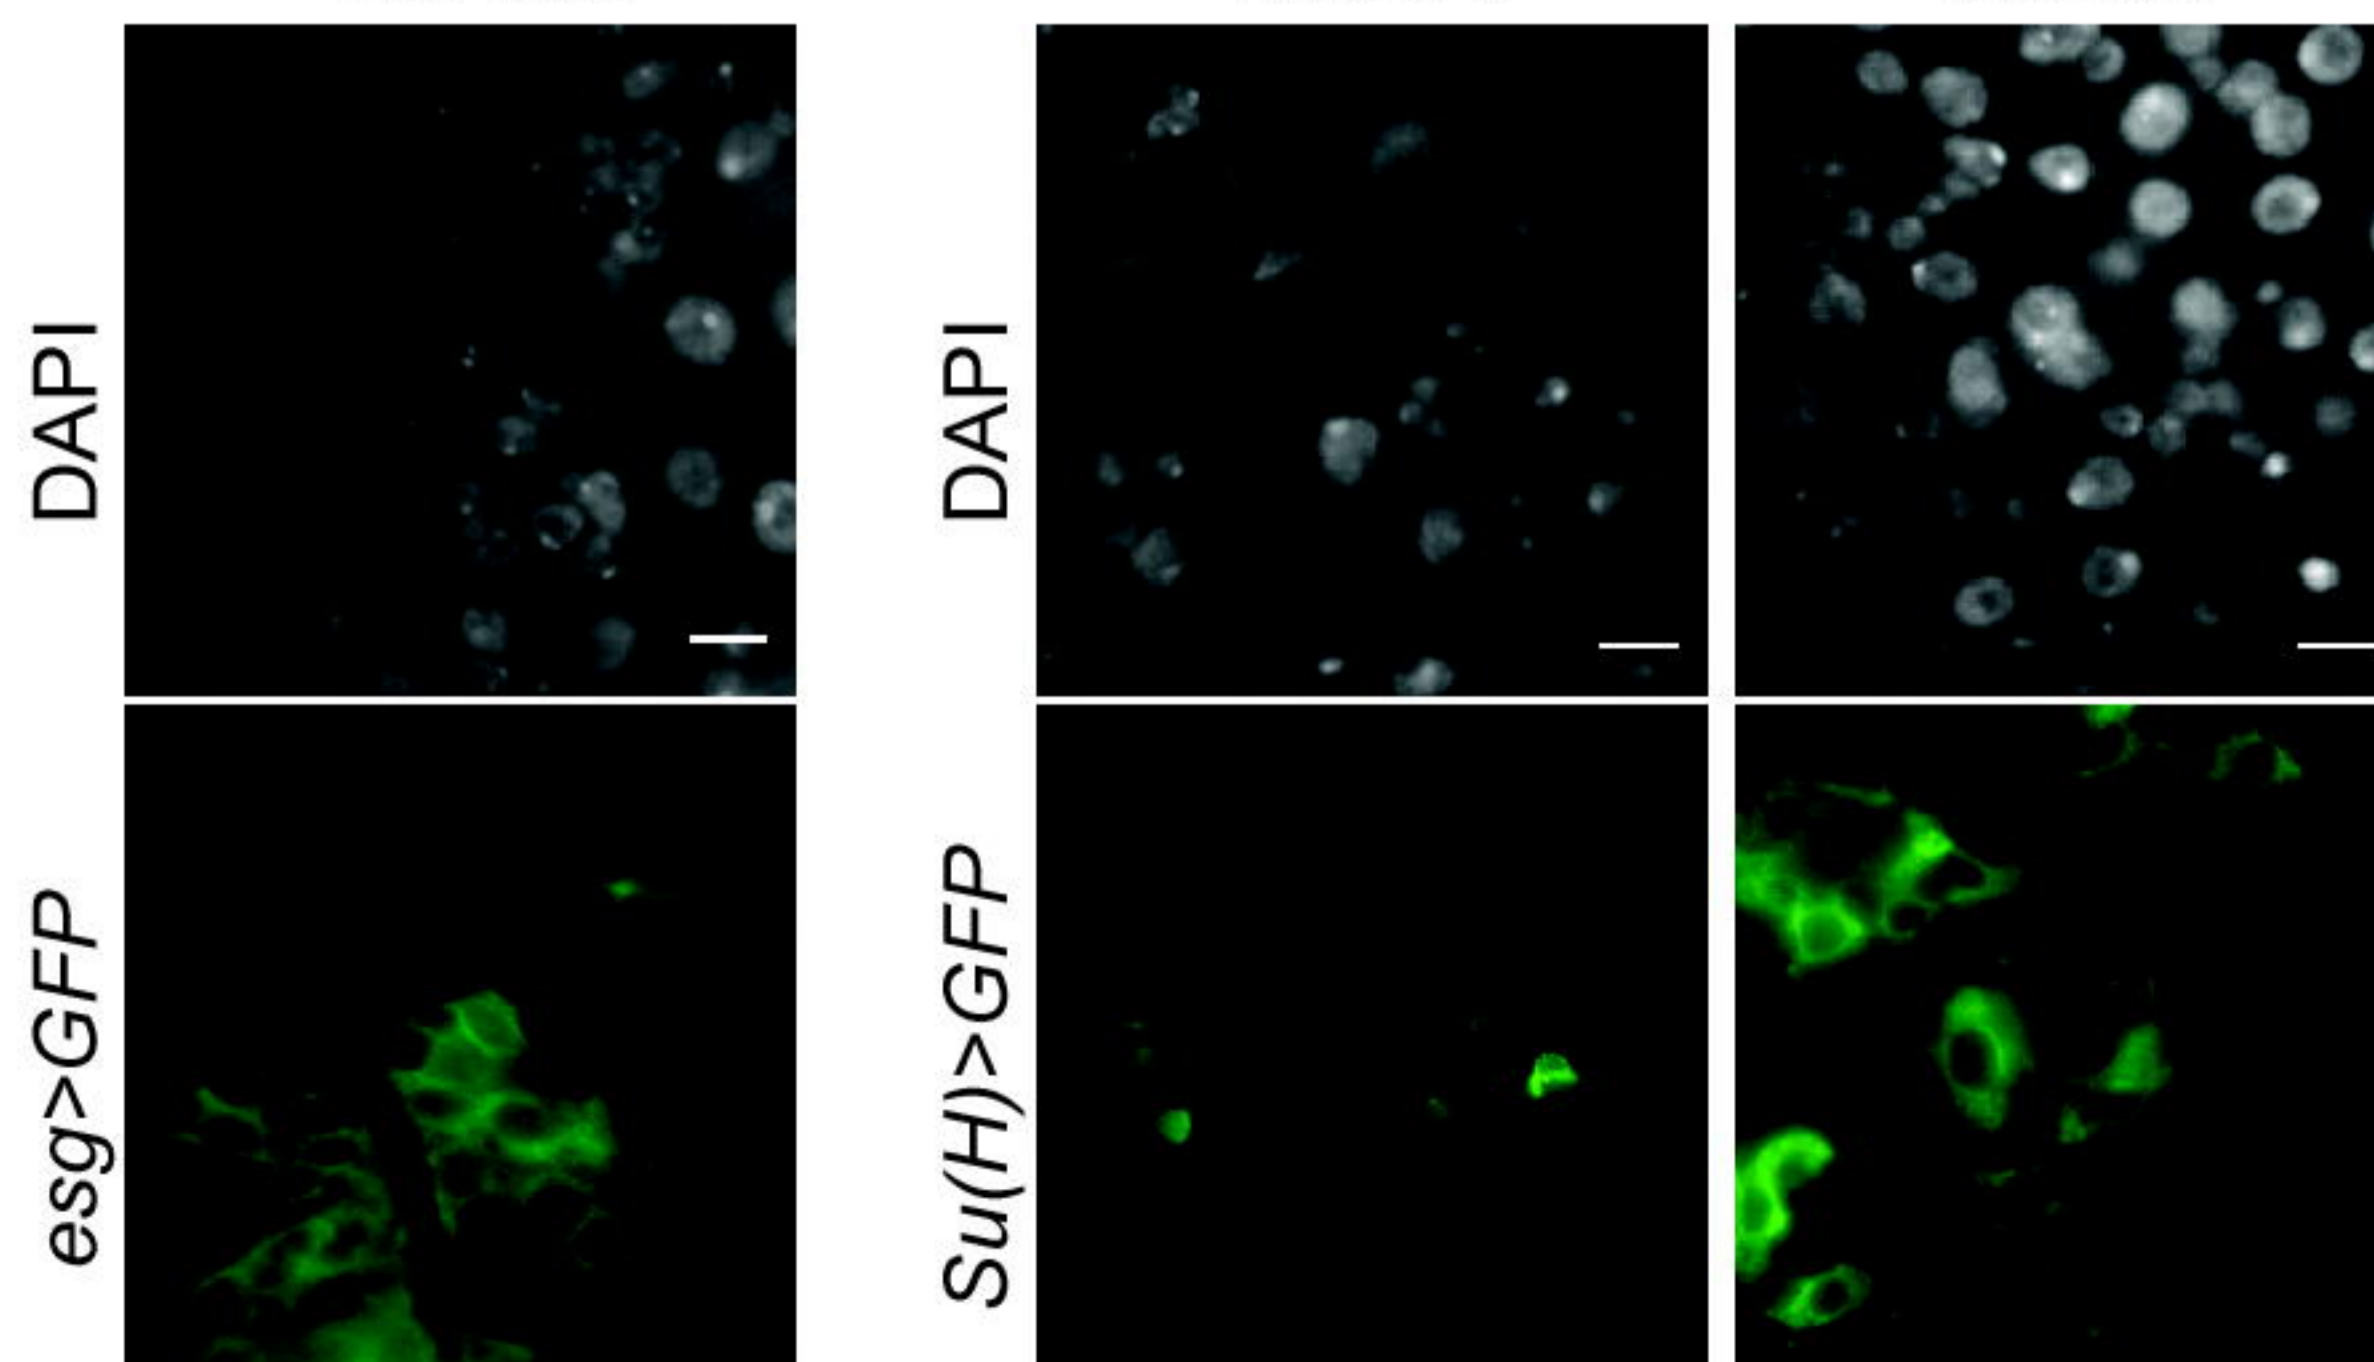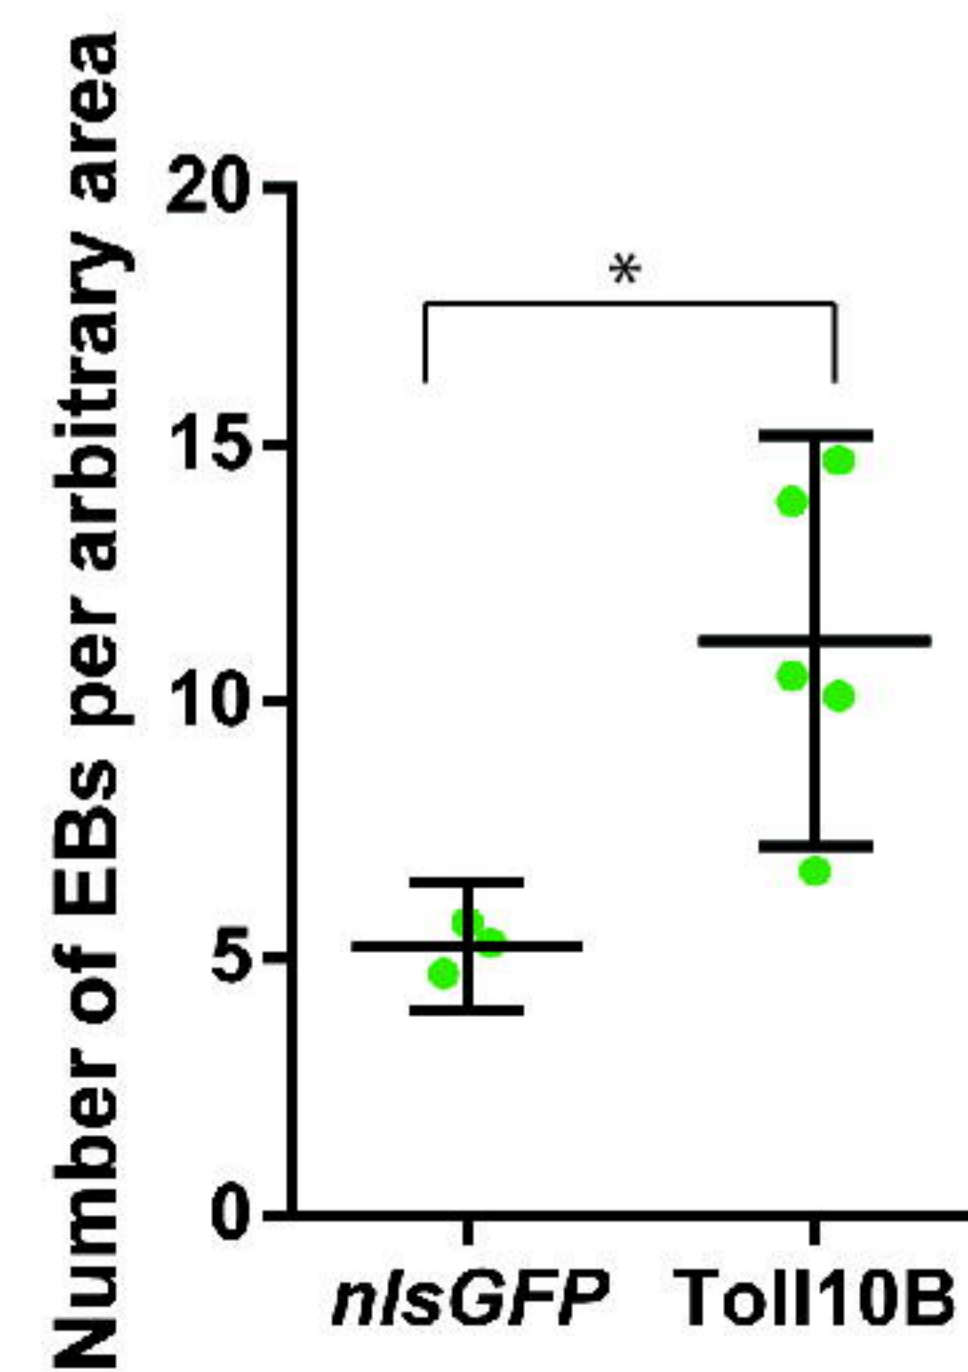



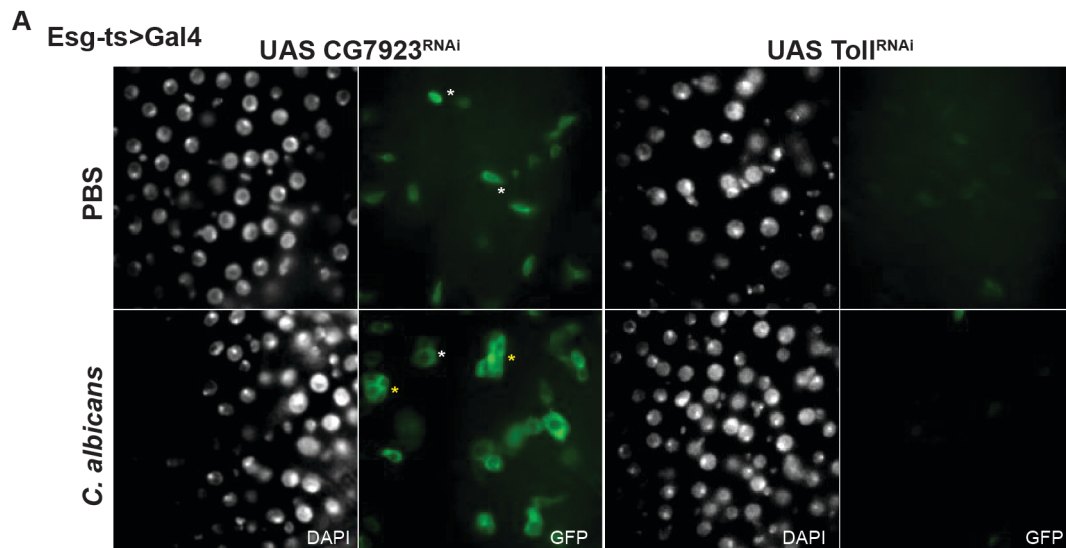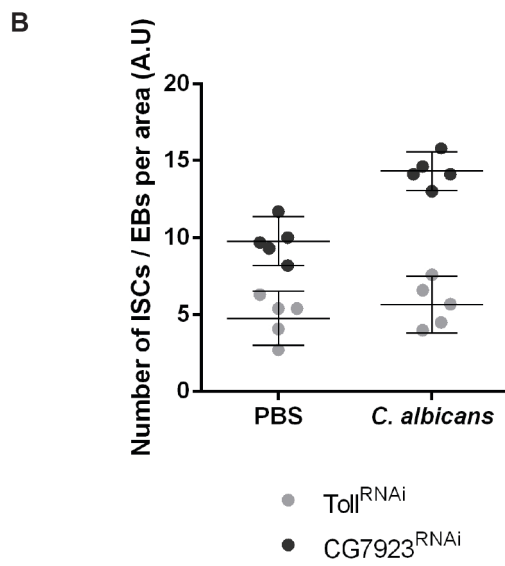

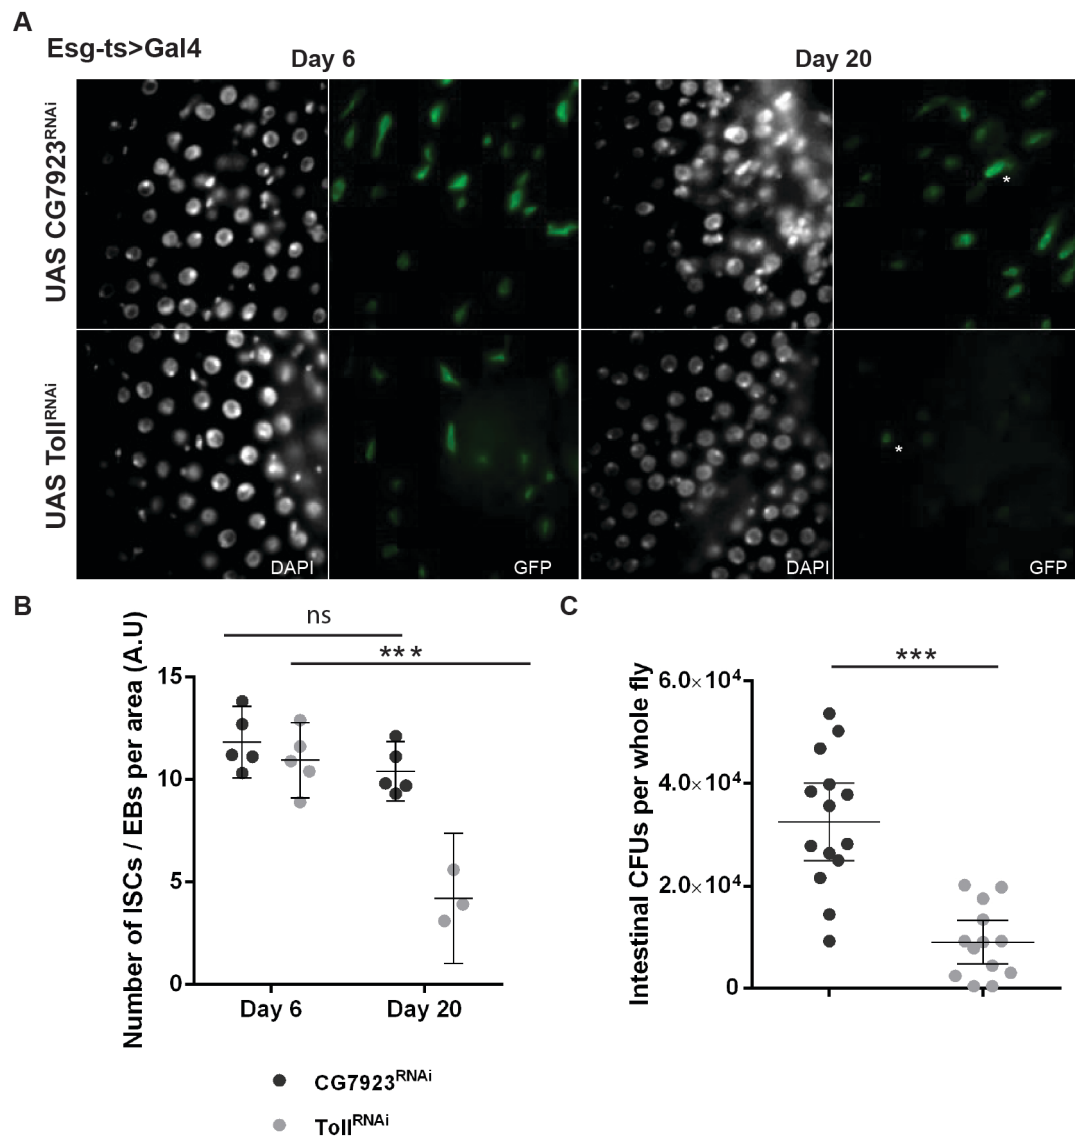

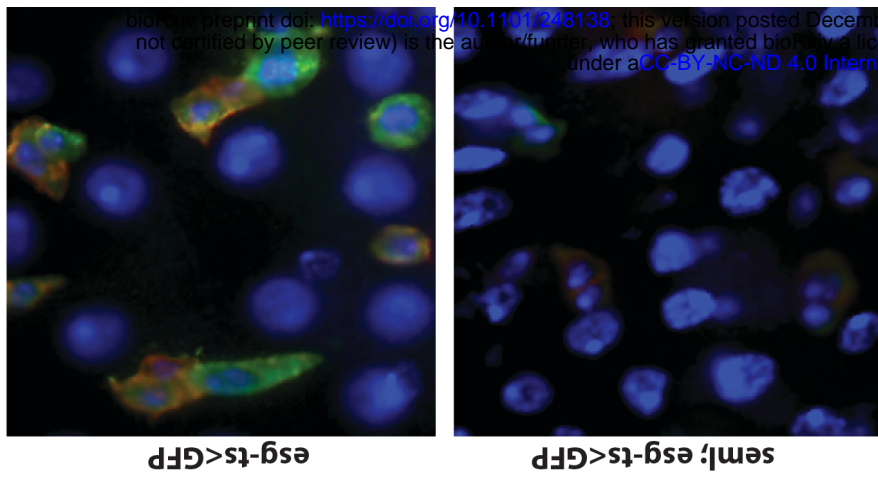

esg-ts<GFP

semi; esg-ts<GFP

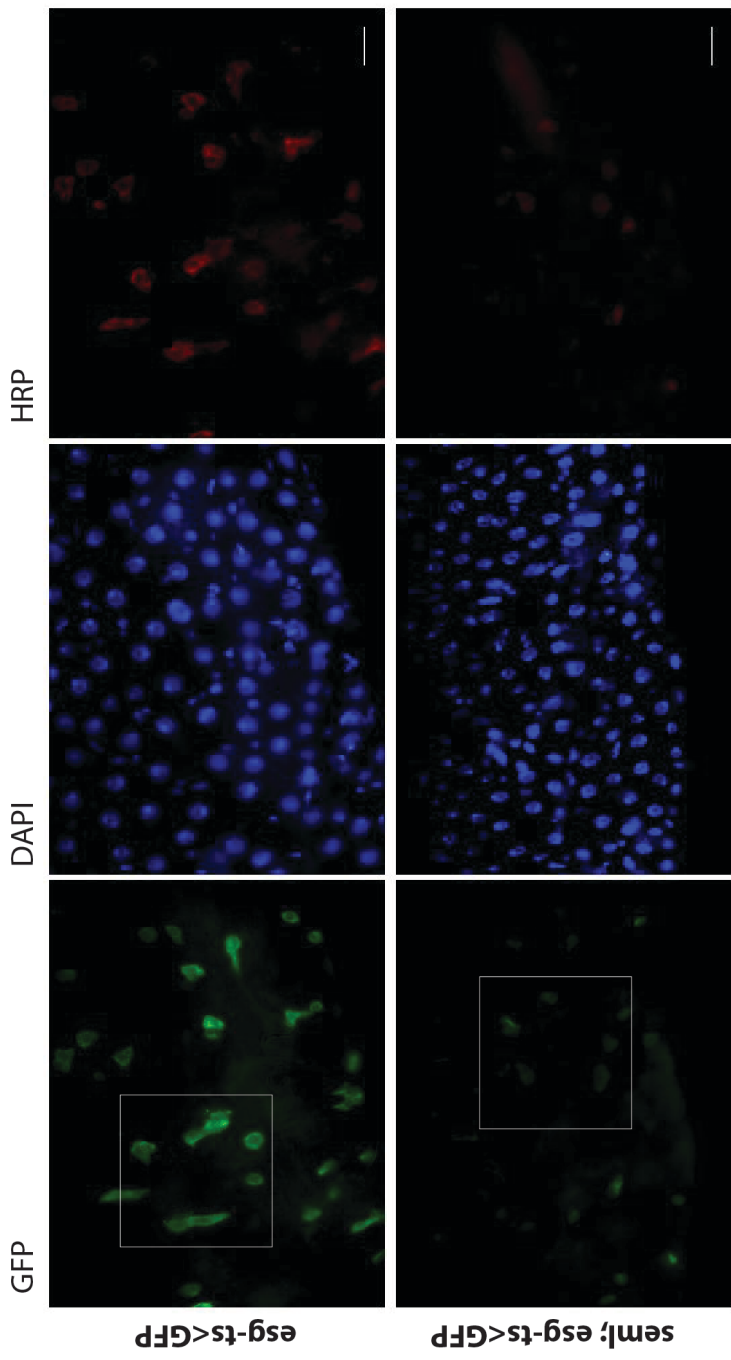

GFP

DAPI

HRP

esg-ts<GFP

semi; esg-ts<GFP

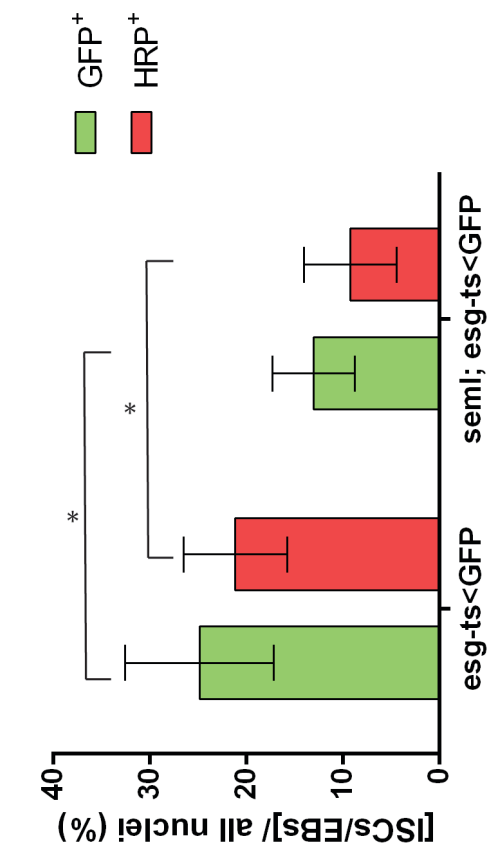

B

A

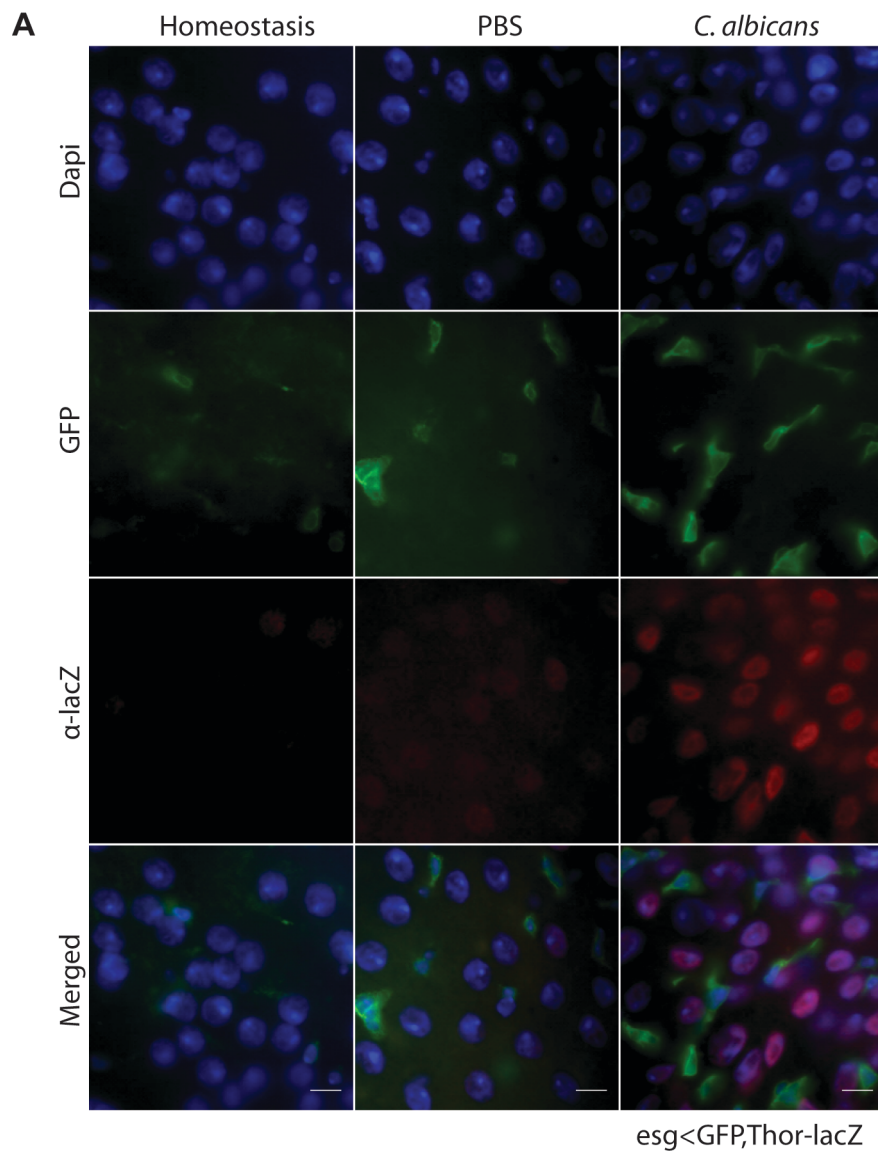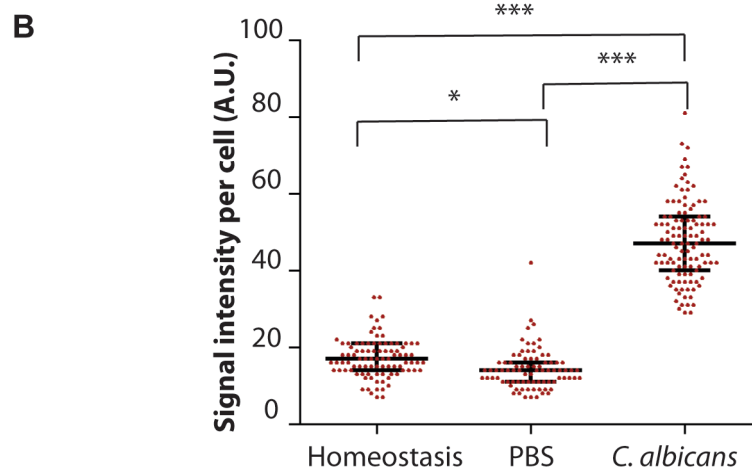

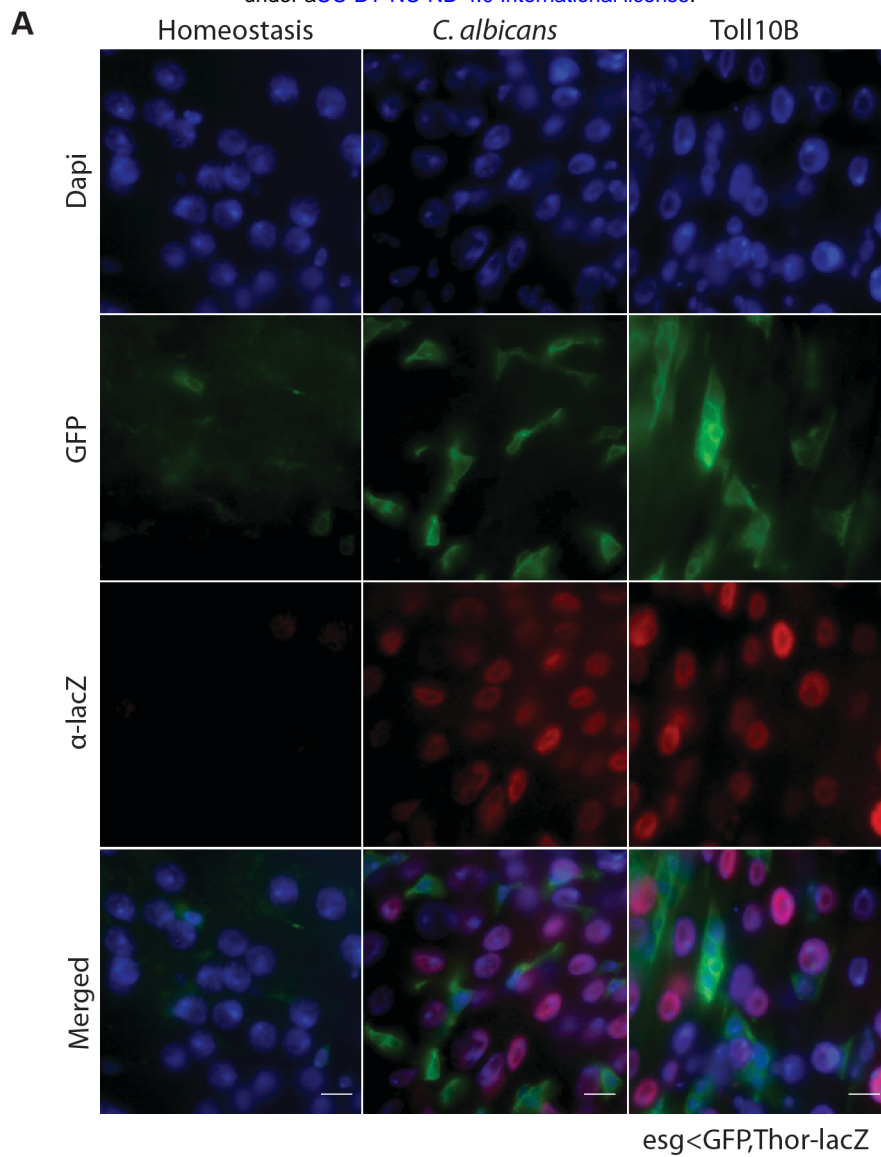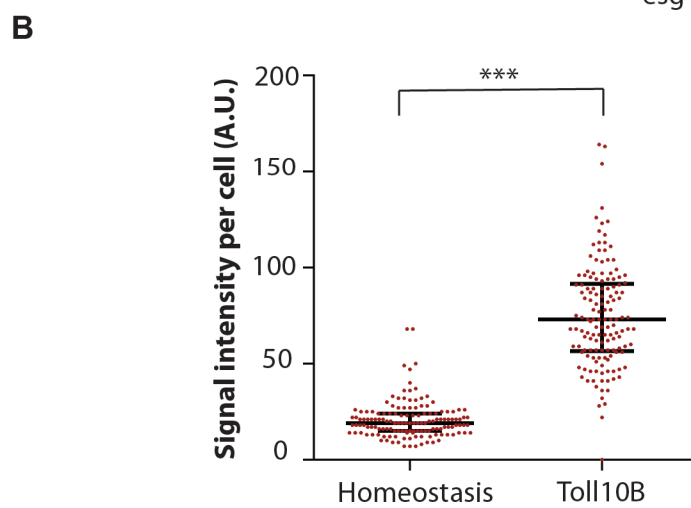



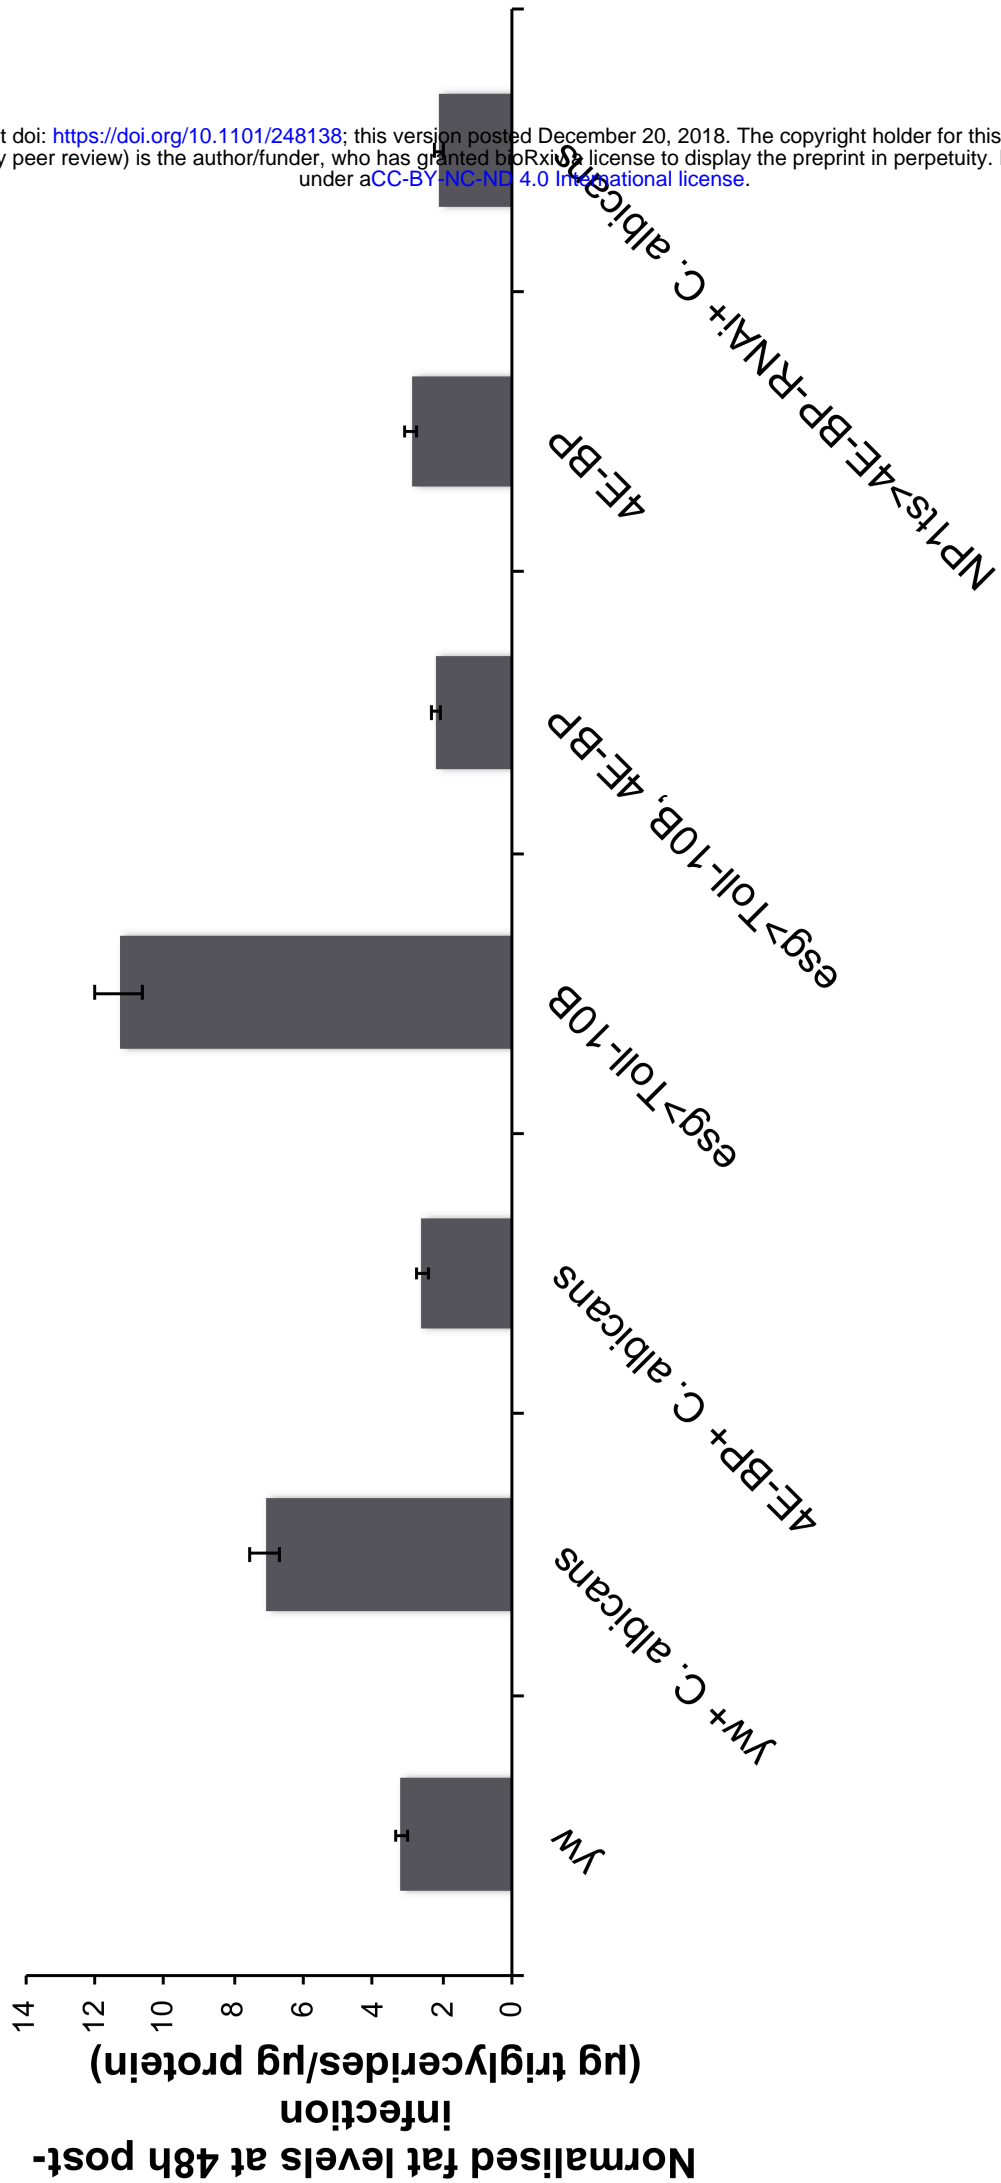

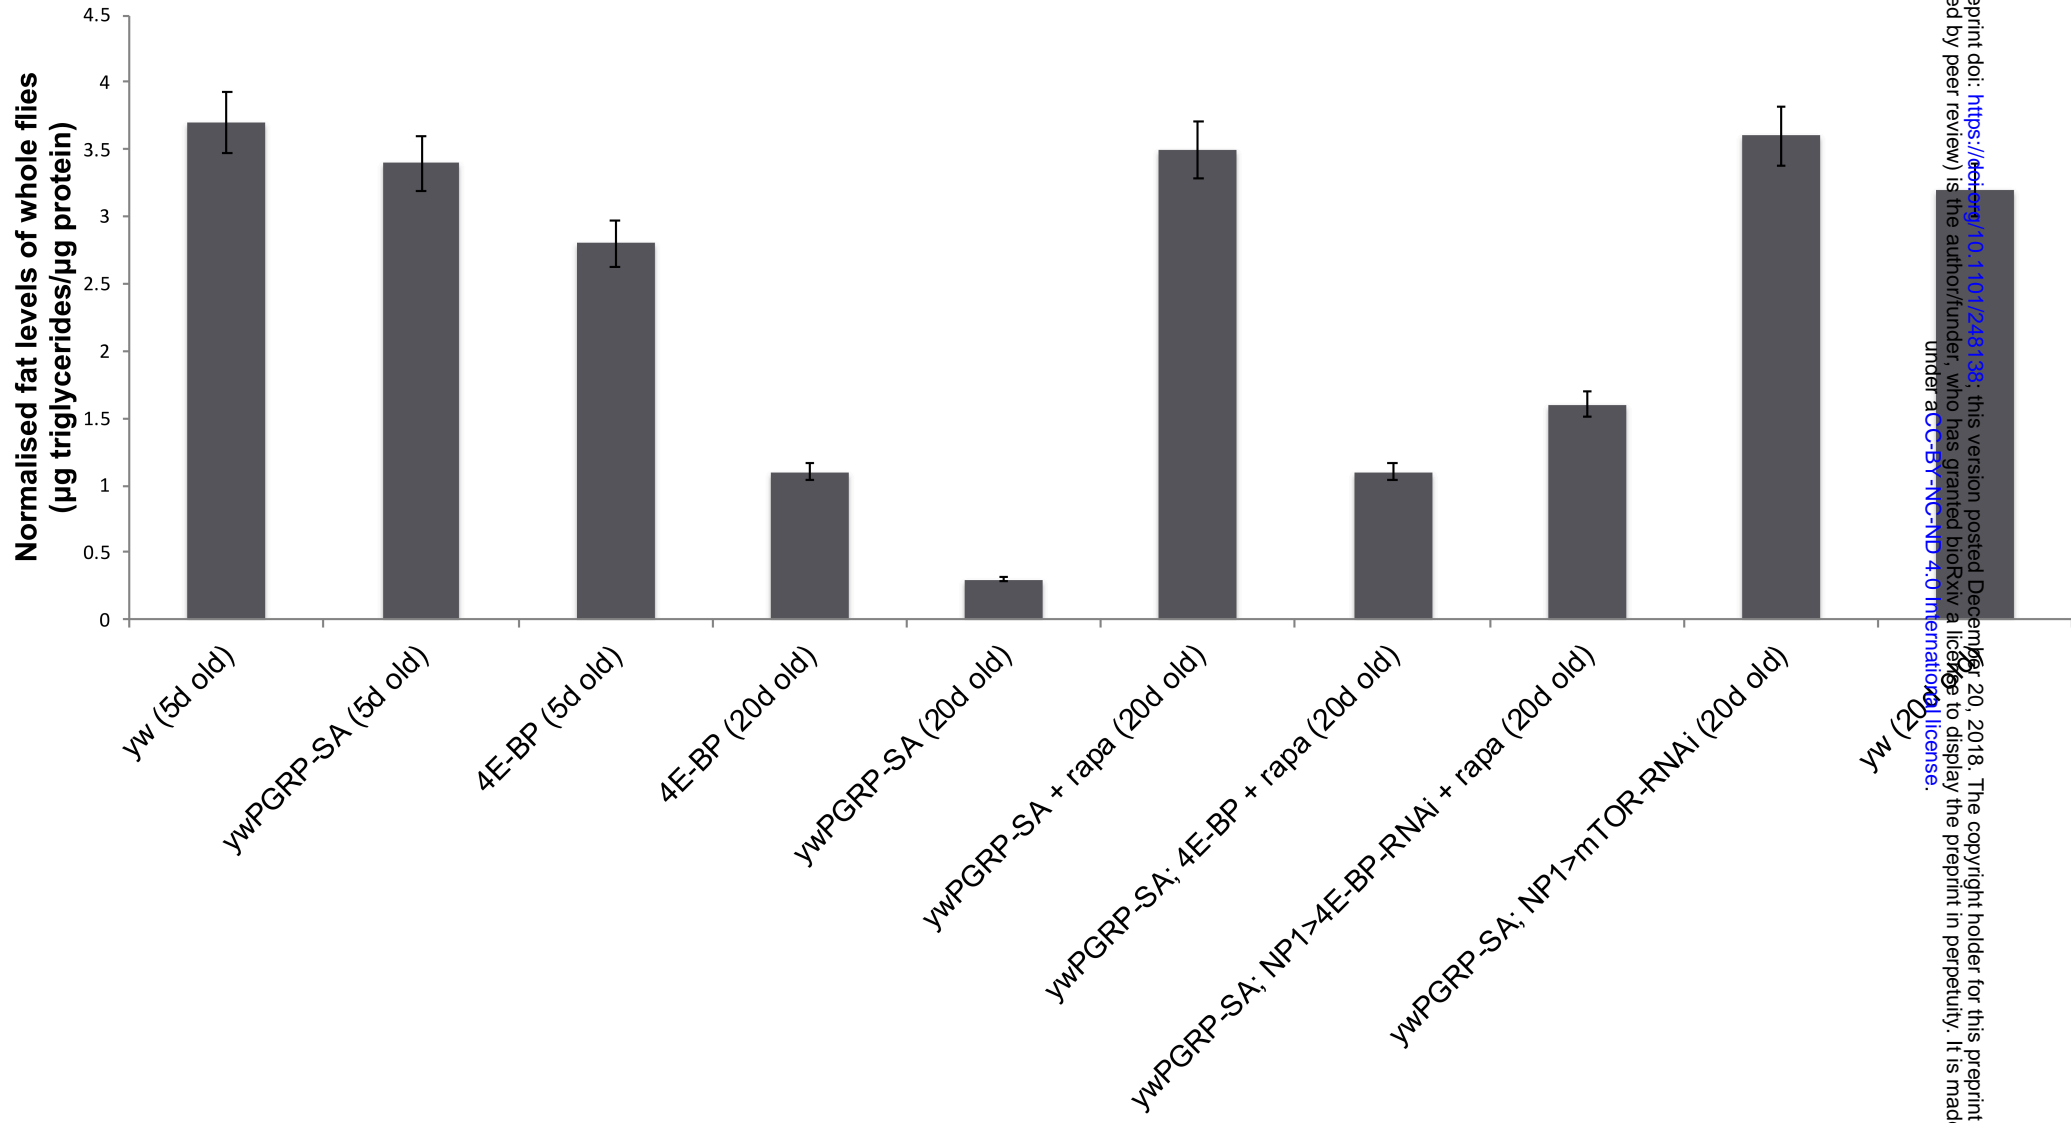

Source: https://www.biorxiv.org/content/10.1101/248138v2.full.pdf
