# Supplementary material for: Drosophila Toll links systemic immunity to long-term intestinal function
Source: bioRxiv or medRxiv preprint supplement (doi:10.1101/248138), 2018-12-20

*spz[rm7] / +*

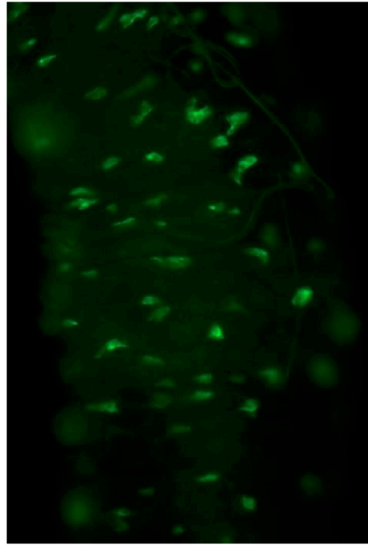

*spz[rm7] / spz[rm7]*

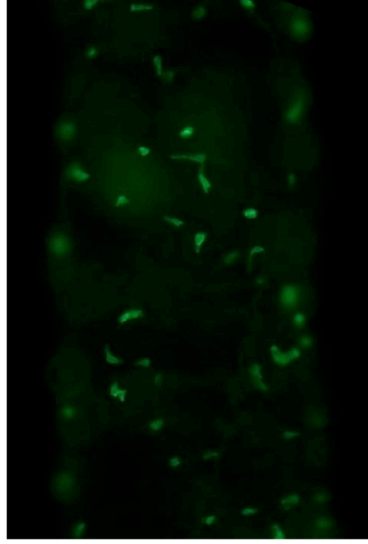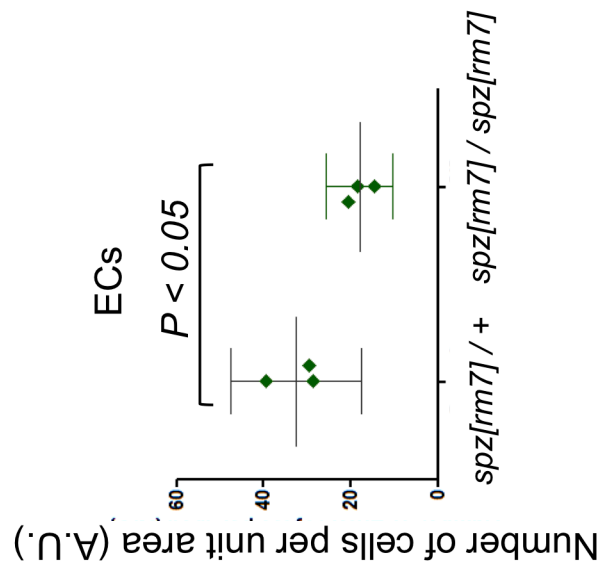

Supplement: Supplementary file [file media-4.pdf]
