# Supplementary material for: Drosophila Toll links systemic immunity to long-term intestinal function
Source: bioRxiv or medRxiv preprint supplement (doi:10.1101/248138), 2018-12-20

**A**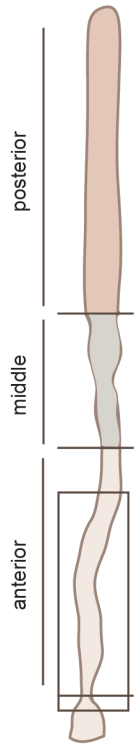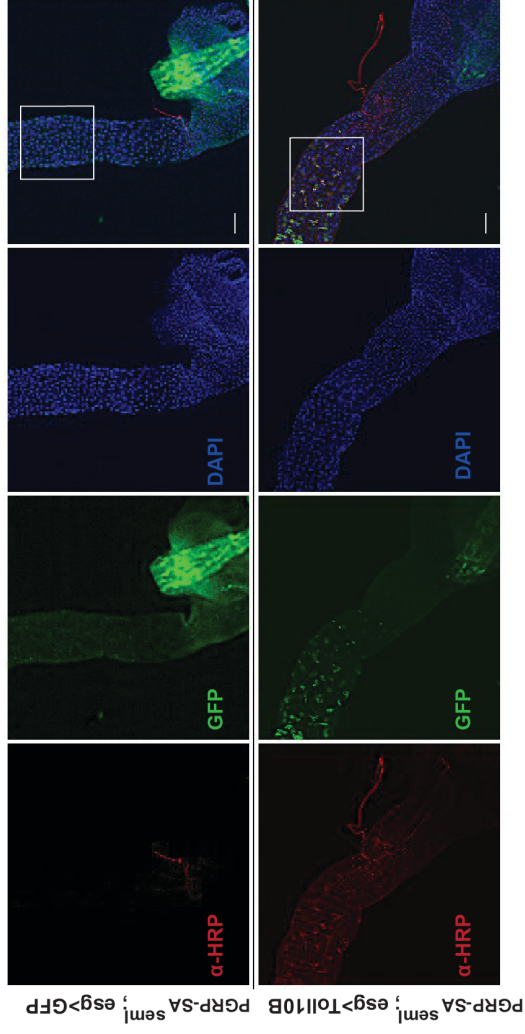

$PGRP-SA^{Sem1}; esg>GFP$   $PGRP-SA^{Sem1}; esg>GFP$   $PGRP-SA^{Sem1}; esg>Toll10B$

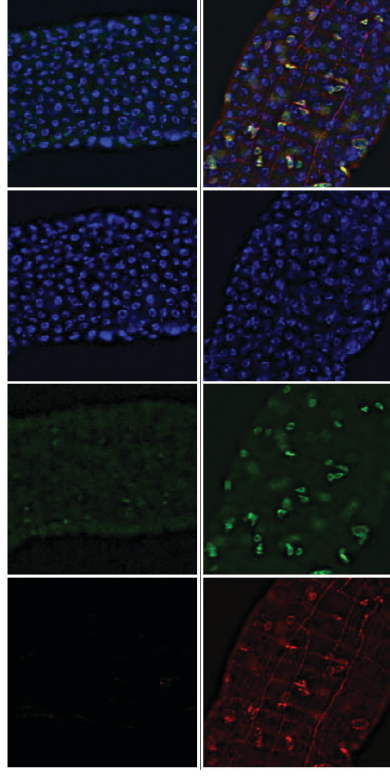**B**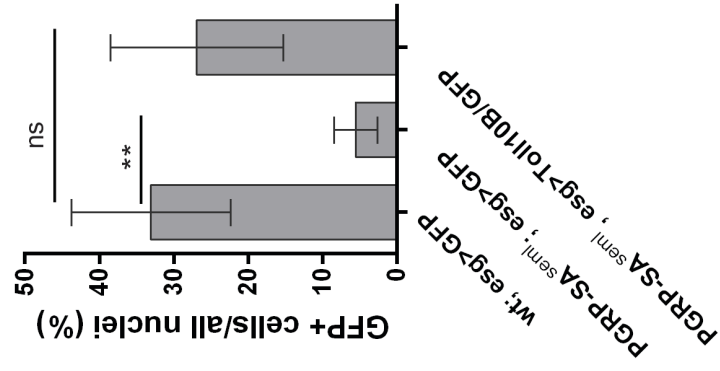

Supplement: Supplementary file [file media-5.pdf]
