# Supplementary material for: Drosophila Toll links systemic immunity to long-term intestinal function
Source: bioRxiv or medRxiv preprint supplement (doi:10.1101/248138), 2018-12-20

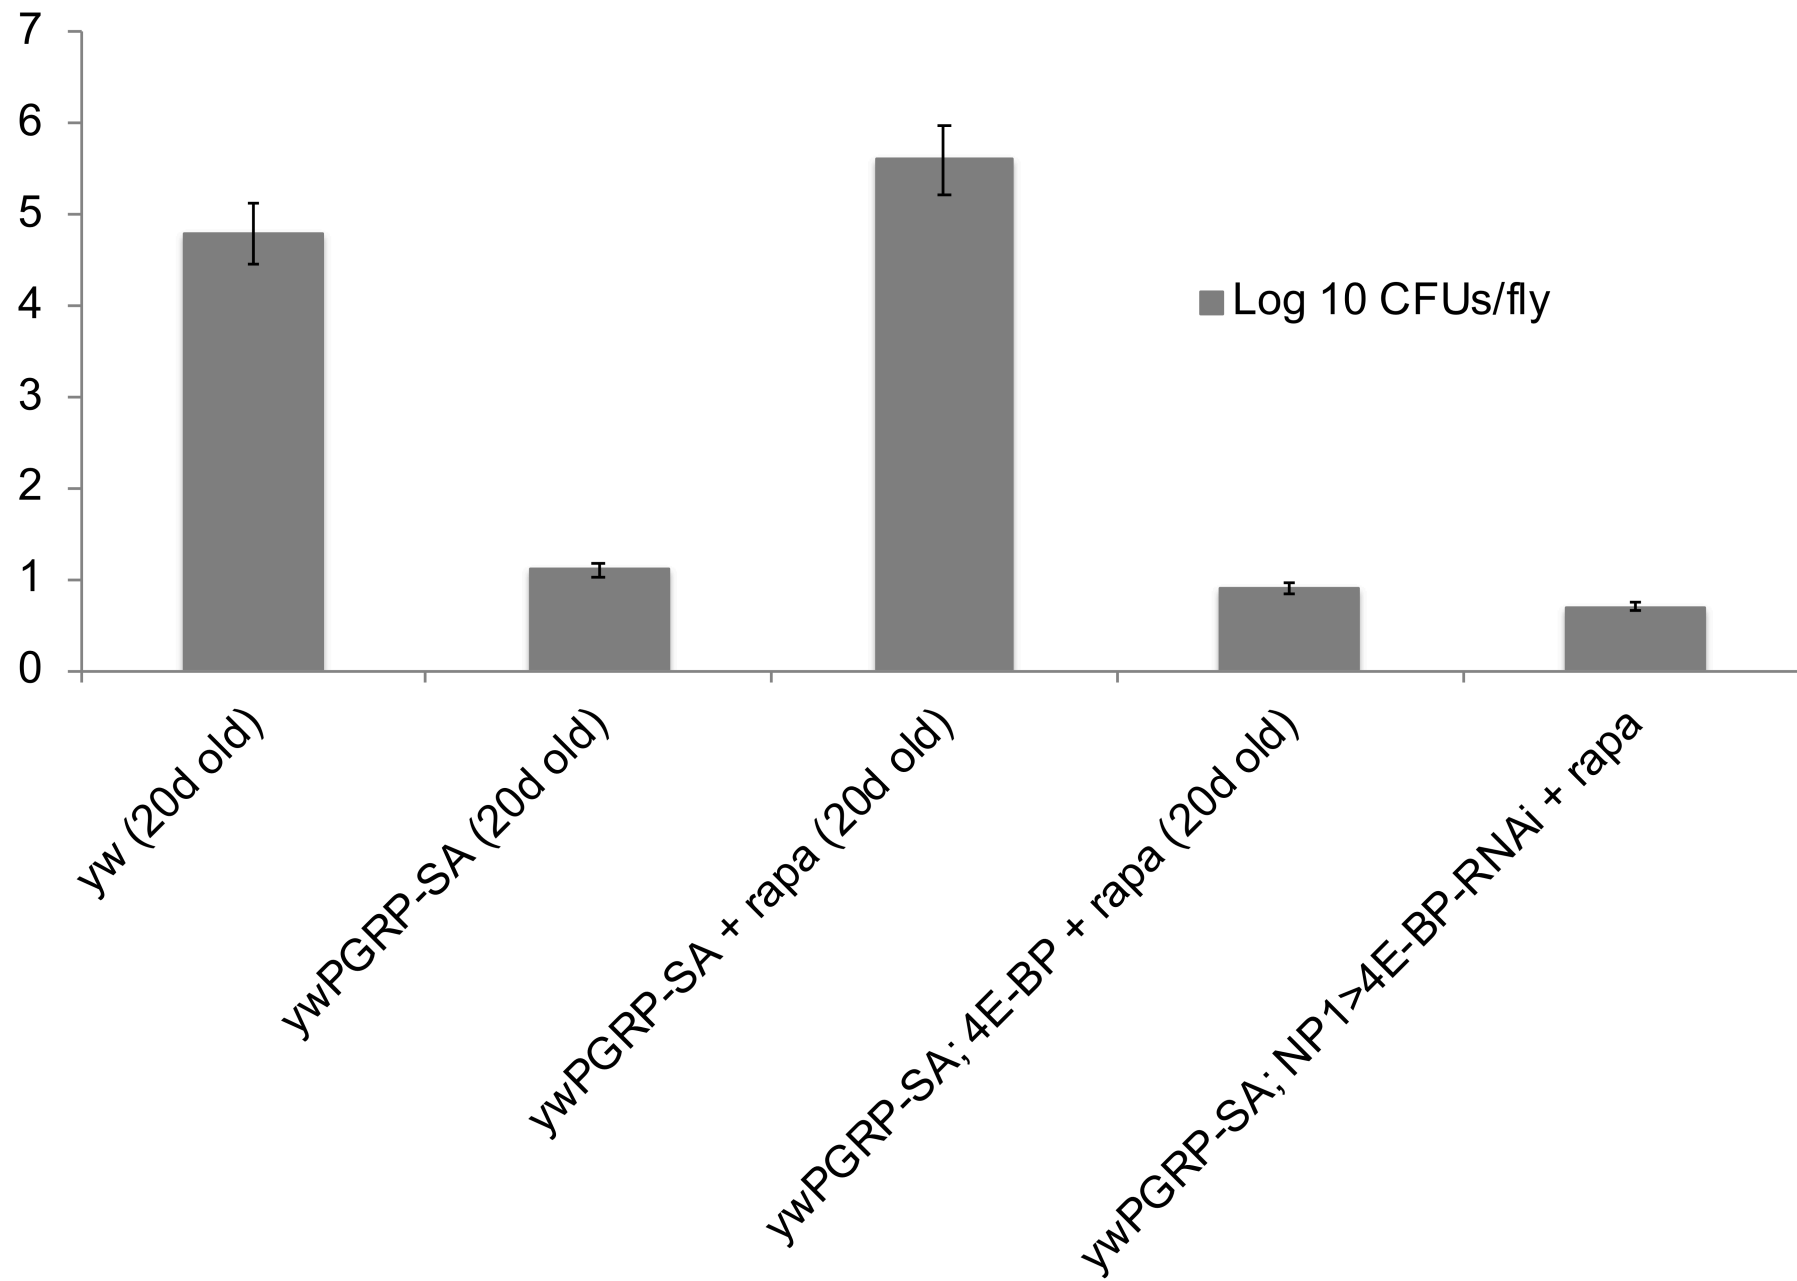

Supplement: Supplementary file [file media-9.pdf]
